# 1 Thunderstruck: The ACDC model of flexible sequences and rhythms in 2 recurrent neural circuits

3 Cristian B. Calderon<sup>1,2</sup>, Tom Verguts<sup>2</sup>, Michael J. Frank<sup>1,3</sup>

4 1. Department of Cognitive, Linguistic & Psychological Sciences, Brown University, USA

5 2. Department of Experimental Psychology, Ghent University, Belgium

6 3. Carney Institute for Brain Science, Brown University, USA

7  
8 **Abbreviated title:** Action sequence flexibility

9 **Corresponding author:**

10 Dr. Cristian Buc Calderon

11 Department of Cognitive, Linguistics & Psychological Sciences

12 Brown University

13 Metcalf Research Building, 190 Thayer St, Providence, RI 02912

14 United States of America

15 Phone: +1 401-863-2727

16 E-mail: cbuccald@gmail.com

17

18 **# of pages:** 40

19 **# of figures and tables:** 7 figures, 1 table

20 **# of words:** abstract (209), introduction (1387), methods (2044), results (2372), discussion (2351)

21

22 **Conflict of interest:** The authors declare no competing financial interests

23

24 **Acknowledgements:** C.B.C is supported by FWO grant #1207719N. T.V. is supported by BOF17-GOA-  
25 004. M.J.F. is supported by R01MH084840-08A1. We thank the members of the Frank and Verguts lab  
26 for helpful discussions, and Jose Miguel Buc Chavez for the bossa nova rhythm description.

27

28 **Keywords:** Action sequences, recurrent neural network, premotor cortex, basal ganglia, motor timing

29

30

31

32

33

## Abstract

34 Adaptive sequential behavior is a hallmark of human cognition. In particular, humans can learn to  
35 produce precise spatiotemporal sequences given a certain context. For instance, musicians can not only  
36 reproduce learned action sequences in a context-dependent manner, they can also quickly and flexibly  
37 reapply them in any desired tempo or rhythm without overwriting previous learning. Existing neural  
38 network models fail to account for these properties. We argue that this limitation emerges from the fact  
39 that order information (i.e., the position of the action) and timing (i.e., the moment of response  
40 execution) are typically stored in the same neural network weights. Here, we augment a biologically  
41 plausible recurrent neural network of cortical dynamics to include a basal ganglia-thalamic module  
42 which uses reinforcement learning to dynamically modulate action. This “associative cluster-dependent  
43 chain” (ACDC) model modularly stores order and timing information in distinct loci of the network. This  
44 feature increases computational power and allows ACDC to display a wide range of temporal properties  
45 (e.g., multiple sequences, temporal shifting, rescaling, and compositionality), while still accounting for  
46 several behavioral and neurophysiological empirical observations. Finally, we apply this ACDC network  
47 to show how it can learn the famous “Thunderstruck” song and then flexibly play it in a “bossa nova”  
48 rhythm without further training.

49

50

## Introduction

51 Learning and manipulating sequential patterns of motor output are essential for virtually all domains of  
52 human behavior. For instance, musicians can learn multiple precise spatiotemporal sequences each with  
53 their own rhythm. They can modify the rhythm within each sequence, i.e. speed up or slow down the  
54 tempo; or apply different rhythms on a previously learned sequence, i.e. perform a rock song with a  
55 bossa nova rhythm. This implies that musicians can quickly and flexibly manipulate action timing in  
56 action sequences. Similar capabilities abound in many other domains, such as language production and  
57 athletics.

58 Precisely timed action sequences are thought to emerge from dynamical neural patterns of activity. In  
59 particular, sparse sequential activity patterns observed in basal ganglia (Jin et al., 2009; Gouvêa et al.,  
60 2015; Mello et al., 2015; Bakhurin et al., 2017; Dhawale et al., 2017), hippocampus (Pastalkova et al.,  
61 2008; MacDonald et al., 2013; Eichenbaum, 2014) and the cortex (Luczak et al., 2007; Harvey et al.,  
62 2012; Remington et al., 2018) are thought to provide a temporal (ordinal) signal for these action  
63 sequences to emerge. However, the mechanistic and dynamic principles by which these neural patterns  
64 afford sequential flexibility remain unknown. While several neural network models of corticostriatal  
65 circuit exist, these are typically applied to single shot stimulus-action pairings rather than sequential  
66 choices, despite extensive evidence that basal ganglia is implicated in such sequential behaviors  
67 (Graybiel, 1998).

68 In this paper, we sought to develop a biologically plausible neural computational model of cortico-basal  
69 ganglia circuitry sufficiently powerful to learn arbitrary sequences (e.g., scales) and easily adjust their  
70 timing and expression on the fly. In particular, we aimed for the network to be able to learn multiple  
71 arbitrary sequences and to allow for temporal asynchrony, shifting, rescaling, and compositionality. We  
72 define these terms more precisely below.

73 Existing neurocomputational models of sequence production can be broadly categorized in three  
74 classes, each with their advantages and disadvantages in computational power and their ability to  
75 account for behavioral and neural features of action sequences.

- 76 • In associative chain models (also termed synfire chain; e.g., Fiete et al., 2010), activation flows  
77 sequentially from one neuron (or neuronal population) to another through feedforward  
78 connections (e.g., Cone and Shouval, 2021). The sequence emerges from the hard-wired

79 structure of the chain. Associative chain models naturally produce sequential but also  
80 persistent neural activity, both of which are observed empirically (Veliz-Cuba et al., 2015;  
81 Pereira and Brunel, 2020). They can also deal with inherent compression of sequential activity,  
82 and thereby learn to produce each action in the sequence at any desired precise time (Cone and  
83 Shouval, 2021). However, these models are not equipped to facilitate *temporal rescaling*: the  
84 finding that learned action sequences can be sped up (compressed) or slowed down (dilated)  
85 without the need to overwrite previous learning (Goodbody and Wolpert, 1998; Shmuelof et al.,  
86 2012). Indeed, a musician who has learned a novel rhythm can directly speed up or slow down  
87 this tempo without any additional learning. Moreover, it is unclear how these models  
88 implement *temporal shifting*: the ability to start the action sequence earlier or later in time,  
89 without modifying the action sequence structure. Chain models also do not straightforwardly  
90 allow networks to encode more than a single sequence, given their hard-wired nature.

91

- 92 • Cluster-based models also involve a chained sequence of activation, but this sequence is learned  
93 via cell assemblies (i.e. clusters) that form within a recurrent neural network (RNN) through, for  
94 instance, spike timing dependent plasticity (Murray and Escola, 2017; Maes et al., 2020).  
95 Depending on the timing of the sequential input to the distinct subsets of the RNN, connectivity  
96 may emerge within and between clusters. Once this connectivity matrix is learned, input to the  
97 RNN induces a sequential activation whereby activation flows from one cluster to another. In  
98 contrast to associative chain models, cluster-based models allow temporal rescaling (Murray  
99 and Escola, 2017) while also producing sequential and persistent patterns of activity (Maes et  
100 al., 2020). Furthermore, they provide a simple mechanism allowing a network to encode  
101 multiple sequences. By selectively activating a specific cluster within the RNN, only the cluster  
102 “in line” (i.e., connected to the previous cluster) will be activated sequentially (and so forth).  
103 Therefore, the RNN can encode multiple sequential behaviors by learning (and selectively  
104 activating) distinct cluster chains encoded in the RNN connectivity matrix (Murray and Escola,  
105 2017). Yet, it is unclear how these models could facilitate action sequences with *temporal*  
106 *asynchrony*: the ability to learn, and flexibly manipulate, motor sequences with varying inter  
107 action intervals (an advantage of associative chain models, see Cone and Shouval, 2021). Indeed,  
108 cluster-based models can flexibly manipulate sequences; however, these sequences are typically  
109 iso-synchronous (see Murray and Escola, 2017).

110

- 111       • State-space models (e.g., Hardy et al., 2018) do not assume a chaining structure at all. Based on  
112       a sparsely connected RNN structure, these models are able to learn and reproduce (in the  
113       presence of a noise) a neural trajectory represented in high-dimensional space (Sussillo and  
114       Abbott, 2009; Laje and Buonomano, 2013; Rajan et al., 2016). This neural trajectory acts as a  
115       travelling wave which can then be decoded by downstream neurons to produce sequential  
116       orders. State-space models have the ability to learn highly complex and flexible motor  
117       sequences. However, unlike the other models, state-space models typically require highly  
118       supervised (i.e. continuous teaching signal) and non-biological learning mechanisms. Moreover,  
119       they do not provide a potential mechanism for encoding multiple sequences and fail at  
120       implementing temporal rescaling (unless resorting to very specific learning regimes, see Hardy  
121       et al., 2018).
- 122
- 123       • Finally, none of the models have tackled how a learned sequence at a particular tempo can be  
124       executed with a completely different tempo which may have been learned for a different  
125       sequence (e.g., applying a bossa nova rhythm to a rock song). We refer to this ability as  
126       *temporal compositionality*.

127   In sum, all models can account for distinct functionalities in sequence production, but fail to provide a  
128   plausible neurocomputational mechanism from which most fundamental abilities – temporal  
129   asynchrony, shifting, rescaling, compositionality – can emerge and interact. These limitations arise from  
130   a property common to all action sequence models: action identity, timing and order are represented  
131   jointly within the recurrent weights of the network<sup>1</sup>. In related sequential decision-making contexts in

---

1

In associative chain models, action timing is principally controlled by the strength of recurrent connections of each excitatory neuron pool, which controls delay times for the next action in line (Cone and Shouval, 2021). Similarly, in cluster models, order and timing information (i.e., when activation “jumps” from one cluster to the other) also depends on the RNN weights (Maes et al., 2020). Finally, state-space models contain both order and time information within the same sets of RNN weights, which define both the neural trajectory and the speed at which the trajectory unfolds (Rajan et al., 2016; Remington et al., 2018).

132 the reinforcement learning domain, such joint coding of task features facilitates only very rigid forms of  
133 generalization and transfer, whereas the ability to code task features compositionally facilitates more  
134 robust transfer (Franklin and Frank, 2018) that can better account for human behavior (Franklin and  
135 Frank, 2020). However, the mechanisms for such compositionality in neural networks remains unknown.

136 Here, we develop a biologically plausible RNN called the associative cluster-dependent chain (ACDC)  
137 model. By combining strengths of the associative chain and cluster-based models, ACDC accounts for  
138 biological data. To increase computational flexibility, the network factorizes order and timing  
139 information by storing them separately in a premotor cortical RNN which is dynamically gated by a basal  
140 ganglia-thalamus module. This modularity thereby affords independent (and flexible) manipulation of  
141 sequence order and action timing. For instance, once an action sequence has been learned, temporal  
142 rescaling can be accomplished by targeting the locus representing time, while still allowing the network  
143 to produce the same desired action order sequence.

144 In the remainder of the paper we first present the architecture of the model, and ground it within the  
145 context of neurophysiological observations on the premotor cortex (PMC) and the BG. Second, we  
146 describe how the model *learns* to produce precisely timed, temporally asynchronous, action sequences.  
147 Third, we demonstrate how the mechanistic properties of the model can account for temporal  
148 properties: temporal shifting, rescaling, compositionality, and sustained motor activation. Fourth, we  
149 simulate both empirical and neurophysiological observations. Finally, we discuss the characteristics and  
150 abilities of the ACDC model in light of neurophysiological evidence and alternative neurocomputational  
151 models.

## 152 **Methods**

### 153 ***The associative cluster-dependent chain (ACDC) model for flexible motor timing***

154 In this section, we provide the reader with an intuitive functioning of the ACDC model in simplified and  
155 more detailed forms (Fig. 1); we refer to Appendix A for a comprehensive mathematical formulation. A  
156 context module encodes the sequences to be executed (e.g., which song is to be played), and is  
157 provided as input to an RNN, which learns to encode sequence order via Hebbian learning. Order is  
158 encoded as a sequence of attractor states represented by persistent activation in distinct excitatory RNN  
159 unit clusters. Cell assemblies (or clusters) learn to project to the appropriate action identity (again via  
160 Hebbian learning), represented topographically in the BG. In turn, the BG project to the corresponding

161 motor thalamus to control action execution. To optimize precise action timing, the weights between  
162 action identity and execution are learned via supervised learning (i.e. Delta rule), perhaps summarizing  
163 the role of cerebellum in error corrective learning. Finally, thalamic activity about the executed action is  
164 fed back to the RNN, ultimately creating a cortico-basal ganglia loop. Each loop subtends the  
165 appropriate action order, identity and timing execution, allowing precisely timed action sequences to  
166 unfold.

167 In a more detailed manner, our ACDC model contains four main modules (Fig. 1 right panel): an input  
168 layer (Fig. 1A), an RNN (representing premotor cortex; Fig. 1B) and a BG-thalamus unit (Fig. 1C).

169 The input layer (Fig. 1A) consists of a vector of neurons, of which a subset is activated, representing  
170 sensory or other context that would signal the identity of the sequence to be produced or learned.

171 Crucially, the dynamics within the ACDC model evolve as a sequential unfolding of RNN-BG-thalamus-  
172 RNN (i.e., cortico-basal ganglia) loops, depicted by the light blue arrows in figure 1. The sequence starts  
173 with the activation of a cluster (i.e., densely interconnected) of excitatory RNN neurons (Fig. 1B). Each  
174 cluster will come to encode the  $i^{\text{th}}$  element in the action sequence. As opposed to single unit, clustered  
175 neurons provide a biologically plausible mechanism for supporting persistent activation within the  
176 cluster given a phasic input (i.e., an attractor; Amit, 1988; Durstewitz et al., 2000). In prefrontal cortical –  
177 BG models, such clusters are referred to as “stripes” based on their anatomical existence, and are  
178 independently gated by BG (O’Reilly and Frank, 2006). Once a cluster is activated, the RNN temporarily  
179 settles on an attractor state indicating the ordinal position (order or rank) in the sequence, analogous to  
180 how distinct PFC stripes code for ordinal positions in phonological loop tasks(O’Reilly and Frank, 2006).  
181 However, in ACDC such clusters emerge naturally via learning rather than hard-coded anatomical  
182 entities. Moreover, attractor states are maintained via E-I balance: each excitatory neuron projects to a  
183 common single inhibitory neuron (orange circle in Fig. 1B) which reciprocally inhibits all excitatory RNN  
184 neurons. As long as the E-I balance is not perturbed by another input (see below), activation in the  
185 cluster will persist and the RNN will continue representing the  $i^{\text{th}}$  order in the sequence.

186 In turn, each excitatory RNN cluster projects to its corresponding “Go” unit in the BG (blue arrow 1 from  
187  $i^{\text{th}}$  cluster in Fig. 1B to G node in Fig. 1C), and each Go cell accumulates evidence for the  $j^{\text{th}}$  action  
188 associated to the  $j^{\text{th}}$  order (see Frank, 2006 and Ratcliff and Frank, 2012 for related computational  
189 models of evidence accumulation in these units, and Doi et al., 2020 for empirical data). Striatal Go cells,  
190 via the basal ganglia direct pathway machinery (Alexander and Crutcher, 1990; Mink, 1996), facilitate

191 response execution by projecting towards the corresponding motor thalamus neurons, from here on  
192 termed Action nodes for simplicity (blue arrow 2 from Go to Action nodes in Fig. 1C).

193 Action nodes possess a negative bias, which acts as a decision threshold, i.e., the net input needs to  
194 exceed this bias in order for action to be executed. This feature again summarizes the computational  
195 role of the output of the BG, which serves to inhibit action execution until sufficient evidence reaches  
196 the threshold for action gating (Frank, 2006; Wiecki and Frank, 2013; see also Lo and Wang, 2006).  
197 Therefore, the weight values between Go and Action nodes control the speed of action execution: the  
198 BG encode the rhythm. Action execution can be expressed either as a transient or persistent response  
199 (see simulations; Pereira and Brunel, 2020).

200 In turn, Action nodes project excitatory connections to three distinct parts of the network  
201 simultaneously. First, Action nodes project to the cluster of excitatory neurons in the RNN representing  
202 the  $i+1^{th}$  order in the sequences (blue arrow 3a in Fig. 1). Second, Action nodes project to the inhibitory  
203 shared neuron (blue arrow 3b to orange node in Fig. 1), that in turn globally inhibits all the clusters in  
204 the RNN. In this manner, thalamic Action nodes can update the cortical representation by separately  
205 projecting to both inhibitory and excitatory neurons (Schmitt et al., 2017; Rikhye et al., 2018), enabling  
206 the RNN to transition from the current state to the next. That is, the activation of action nodes perturbs  
207 the E-I RNN balance in a way that allows the  $i^{th}$  cluster to shut down and the  $i+1^{th}$  cluster to be expressed  
208 (see Appendix A for further details). Third, Action nodes project excitatory connections back to their  
209 corresponding No Go cells (blue arrow 3c from  $j^{th}$  Action node in the thalamus to  $j^{th}$  No Go node in the  
210 BG, see Fig. 1C). In turn, No Go cells strongly inhibit their corresponding Go cells (Taverna et al., 2008;  
211 Wiecki and Frank, 2013; Dobbs et al., 2016), thereby shutting down evidence in favor of the  $j^{th}$  action,  
212 and hence stopping the execution of the  $j^{th}$  action. This loop is then reproduced with the  $j^{th+1}$  RNN cluster  
213 and  $j^{th+1}$  G-A-N triplet in the BG-thalamus unit, and so forth until the action sequence is performed in its  
214 entirety.



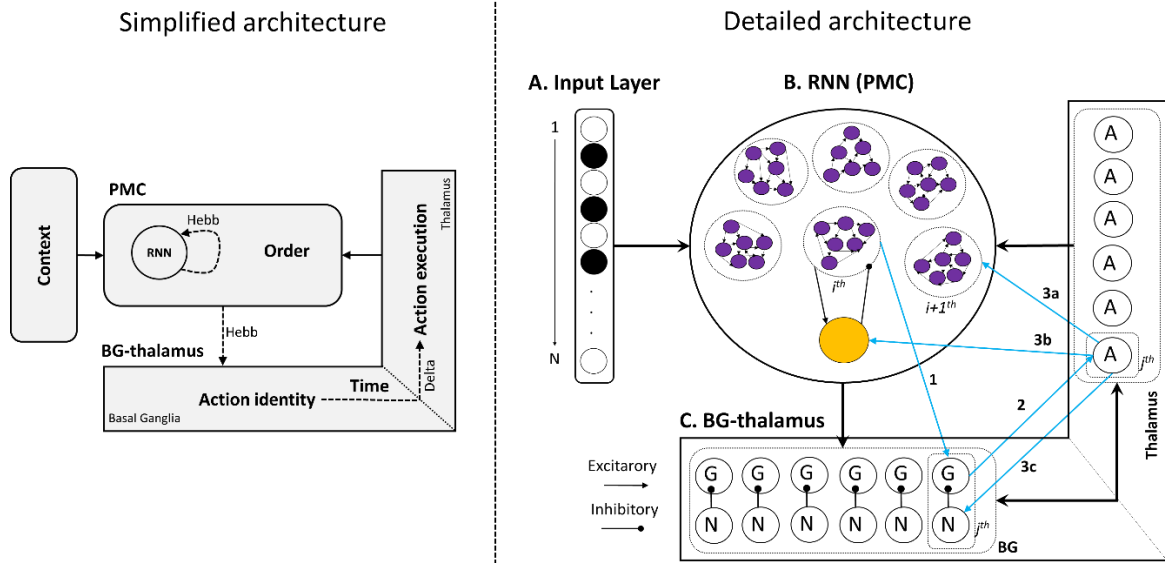

215

216 **Figure 1. Left panel: Simplified ACDC model architecture.** An input context layer indicates which  
 217 sequence needs to be learned or executed. The premotor cortex (PMC) is subtended by a RNN that  
 218 learns (via Hebbian learning) to form clusters of excitatory neurons encoding order in the sequence, and  
 219 which are regulated by an inhibitory pool. In turn, each cluster learns to trigger action plans,  
 220 topographically represented in the BG. Specific actions are executed in the thalamus at specific times  
 221 based on learned connections from BG to thalamus. Motor activity is then fed back to the RNN, closing  
 222 the cortico-basal ganglia loop. The unfolding of several iterations of this loop is responsible for the  
 223 execution of precisely timed action sequences. **Right panel: ACDC full model architecture. A. Input**  
 224 **layer:** codes for contexts indicating the sequence to be learned/produced in a  $N$  length binary vector. **B.**  
 225 **RNN:** represents recurrently interconnected neurons of the PMC, composed of a subset of  
 226 interconnected neurons (i.e., clusters) that can give rise to sequential activation states after learning via  
 227 cortico-basal ganglia loops. All excitatory nodes in the RNN project to a shared inhibitory neuron (orange  
 228 node), which in turn inhibits all excitatory neurons (purple nodes; shown for just one cluster for visual  
 229 simplicity). **C. The BG:** composed of two neuron types G (Go cells) and N (No Go cells). Go nodes  
 230 accumulate evidence over time and excite Action (A) nodes in the BG output /thalamus layer. Once  
 231 activity in the Go nodes reaches a specific threshold, the corresponding action is executed. Once  
 232 executed, Action nodes reciprocally activate No Go nodes which in turn suppress Go nodes, shutting  
 233 down action execution. **The thalamus:** is composed of Action nodes whose activity represents action  
 234 execution. The  $j^{th}$  Action node selectively projects excitatory connections to the  $i^{th+1}$  cluster in the RNN,  
 235 the shared inhibitory neuron and the  $j^{th}$  No Go node in the BG. Light blue arrows represent the  $i^{th}$   
 236 cortico-basal ganglia loop instance.

237 Several features of the model should be highlighted. First, each cluster activation within the RNN acts as  
 238 an attractor state representing the  $i^{th}$  order in the sequence. Interestingly, cells in the monkey PMC code  
 239 for the position in sequence, regardless of the actual movement produced during that position (Clower  
 240 and Alexander, 1998; Shima and Tanji, 2000; Isoda and Tanji, 2003, 2004; Averbeck et al., 2006;  
 241 Berdyeva and Olson, 2009; Salinas, 2009). We therefore assume that the neurons forming each cluster

242 represent rank-order-selective neurons whose activation unfolds sequentially: the RNN encodes order  
243 information.

244 Second, the speed at which each action is executed is driven by how quickly the evidence in the Go  
245 nodes of the BG can cross the decision threshold in the Action nodes: the BG encode time information.  
246 Indeed, several studies suggest that temporal processing is subtended by the BG in the (non)human  
247 primates and rodent brain (Jin et al., 2009; Schwartz et al., 2011; Gershman et al., 2014; Jones and  
248 Jahanshahi, 2014; Mello et al., 2015; Thura and Cisek, 2017; Paton and Buonomano, 2018). Note that  
249 there are multiple routes by which timing can be altered within Go nodes in our model: (i) the learned  
250 weight value between Go and Action nodes; (ii) a bias input to Go nodes (in addition to that coming  
251 from the RNN cluster); and (iii) a multiplicative gain on Go unit activity (see model simulations). As  
252 shown below, these separate routes will become important for providing timing and rhythm flexibility.

253 Third, as in many cortico-BG models (e.g., Gurney et al., 2001; Frank, 2006), and motivated by  
254 anatomical data (Alexander et al., 1986) our model is characterized by topographical organization of  
255 actions across the BG circuit and its outputs (i.e., indexed in our model by the subscript  $j$  associated in  
256 the G-A-N triplet projections). Recent evidence further confirms topographical action representations in  
257 BG-thalamocortical loops (Oh et al., 2014; Hintiryan et al., 2016; Hunnicutt et al., 2016), whereby causal  
258 activation of specific subregions is related to specific output behaviors (Peters et al., 2021), and is also  
259 supported by human neuroimaging (Gerardin et al., 2003) and monkey/rodent neurophysiology studies  
260 (McHaffie et al., 2005; Jin et al., 2009; Znamenskiy and Zador, 2013; Friedman et al., 2015; Gremel et al.,  
261 2016; Hooks et al., 2018; Lee et al., 2020). However, in contrast to previous models in which BG gating  
262 affords action selection of the corresponding cortical action, in the ACDC model BG gating triggers a  
263 cortical dynamical state that initiates the evolution of the *subsequent* item in the sequence.

264 Fourth, we clarify how the ACDC model combines properties of associative chain and cluster-based  
265 models. While the ACDC model does initiate a *chain* via sequential propagation across cortico-BG loops,  
266 the timing of such transitions is controlled by learning the weights within the BG-thalamus unit, and  
267 moreover, what is learned are transitions between clusters of excitatory RNN neurons representing  
268 order in the sequence (Maes et al., 2020). Hence, the ACDC model makes use of two distinct  
269 conceptualizations of sequence learning, to achieve greater computational flexibility (as demonstrated  
270 in the result section).

271 ***Learning in the ACDC model: Hebbian learning for order and Delta rule for time***

272 Learning in the ACDC model takes place in three distinct loci of the network, comprising Hebbian  
273 learning for sequence transitions and error-driven learning for precise timing.

274 First, as previously mentioned, order is coded via persistent activation within clusters of the RNN.  
275 However, in contrast to pure associative chain models, the ACDC does not assume any feedforward  
276 hard-wired structure, but rather learns it. Selective time-dependent inputs to the RNN (i.e., from the  
277 input layer and thalamic Action nodes) activate a subset of neurons within the RNN, which get clustered  
278 together through dynamic synaptic weights:

$$279 \quad \frac{dW_{ij}}{dt} = -\alpha_1((1-x_i)\bar{x}_j) + \alpha_2(x_i\bar{x}_j(W_{\max} - W_{ij})) \quad \text{equation 1}$$

280 where  $\bar{x}_j$  is presynaptic activity low-pass filtered over a time scale  $\tau_w$ ;  $x_i$  is postsynaptic activity;  $\alpha_1$  and  
281  $\alpha_2$  are learning rate parameters. When  $\bar{x}_j$  and  $x_i$  are both simultaneously  $> 0$ ,  $W_{ij}$  goes to  $W_{\max}$ ;  
282 otherwise  $W_{ij}$  goes to 0. Note that  $\bar{x}_j(t)$  will be non-zero if unit  $j$  is active within the time window from  $t$   
283  $-\tau_w \rightarrow t$  (as in Murray and Escola, 2017).

284 Second, Equation 1 is also used to learn connections between the RNN and the Go nodes of the BG  
285 module; here, pre- and postsynaptic activity refer respectively to RNN excitatory unit activity and Go  
286 nodes activity (weight values between RNN units and Go nodes are randomly initialized from a Gaussian  
287 distribution with mean =  $0.5 / N$  and s.d. =  $0.1 / N$ , where  $N$  is the number of RNN excitatory units).

288 Third, action specific execution time is coded in the weights connecting Go and Action nodes. Here, we  
289 describe time learning as a delta rule, whereby an agent receives a supervisory signal explicitly indicating  
290 whether a specific action has been produced before (positively signed signal to increase weights) or  
291 after (negatively signed signal to decrease weights) the appropriate time, as described in equation 2:

$$292 \quad \Delta W = \eta(t_{\text{observed}} - t_{\text{desired}}) \quad \text{equation 2}$$

293 where the change in weight ( $\Delta W$ ) between the  $j^{\text{th}}$  Go and Action nodes is driven by the learning rate  $\eta$ ,  
294 and the error computed as the difference between the observed and desired response time ( $t$ ) for each  
295 action. Weight values between Go and Action nodes are randomly initialized and drawn from a random  
296 Gaussian distribution (mean = 2, s.d. = 0.2). Learning of precisely timed sequences is shaped sequentially  
297 (i.e., in chunks): the model first learns to produce the first action at the appropriate time (i.e. until the  
298 error  $< \phi$  and  $\phi$  is a low value, see table 1 in Appendix A), then the second, and so forth. Note that

299 learning by chunking improves motor execution (Wymbs et al., 2012; Boutin et al., 2013; Lungu et al.,  
300 2014; Graybiel and Grafton, 2015; Doyon et al., 2017), and chunk-based representation is at the base of  
301 several theoretical models of motor sequence learning (Abrahamse et al., 2013; Verwey et al., 2014;  
302 Diedrichsen and Kornysheva, 2015).

303 Below we describe all the simulations emerging from the ACDC model; parameter values for all  
304 simulations are reported in table 1 of Appendix A, and simulation code is available from  
305 <https://github.com/CristianBucCalderon/ACDC>. We start by describing how the model can learn to  
306 produce precise spatiotemporal sequences. We then simulate all the temporal properties of the model:  
307 reproduction of an action sequence with temporal asynchrony, temporal shifting, rescaling, and  
308 compositionality, and sustained motor activation. Finally, we describe and simulate empirical and  
309 neurophysiological observations.

## 310 **Results**

### 311 ***Learning precise spatiotemporal sequences***

312 Figure 2 shows the result of the first simulation, where the ACDC model learns to produce a precisely  
313 timed, temporally asynchronous, action sequence. For the purpose of clarity, we limit the sequence to 6  
314 actions. The goal of the model in this simulation is to produce each action sequentially at the  
315 appropriate time, i.e. action 1 through 6 have to be executed respectively at times 200, 250, 400, 700,  
316 750 and 900 ms (within a 1 second window). Note that this is an arbitrarily chosen timing sequence; the  
317 model can (learn to) produce any timed, synchronous (see Thunderstruck simulation below) or  
318 asynchronous, sequence. Figure 2A shows how the activity of each Action node goes down the gradient  
319 and progressively reaches the optimal time (depicted by color coded vertical dashed lines), reflected in a  
320 decrease in the action timing error (Fig. 2B) and in the weight changes between Go and Action nodes  
321 (Fig. 2C).

322 Figure 2D depicts the RNN connectivity matrix after learning (weights are zero before learning).  
323 Excitatory projections to the RNN from the input and motor layer are pseudo-random, with the  
324 restriction that two different projections never excite the same RNN neuron. These pseudo-random  
325 projections make it hard to visually identify the presence of clusters in fig2D; importantly however, this  
326 connectivity matrix does induce clustered dynamics (see Video 2 and Fig. 7A below). Finally, figure 2E  
327 shows how the  $i^{th}$  cluster in the RNN learns to be (almost) selectively wired with the  $j^{th}$  Go node.

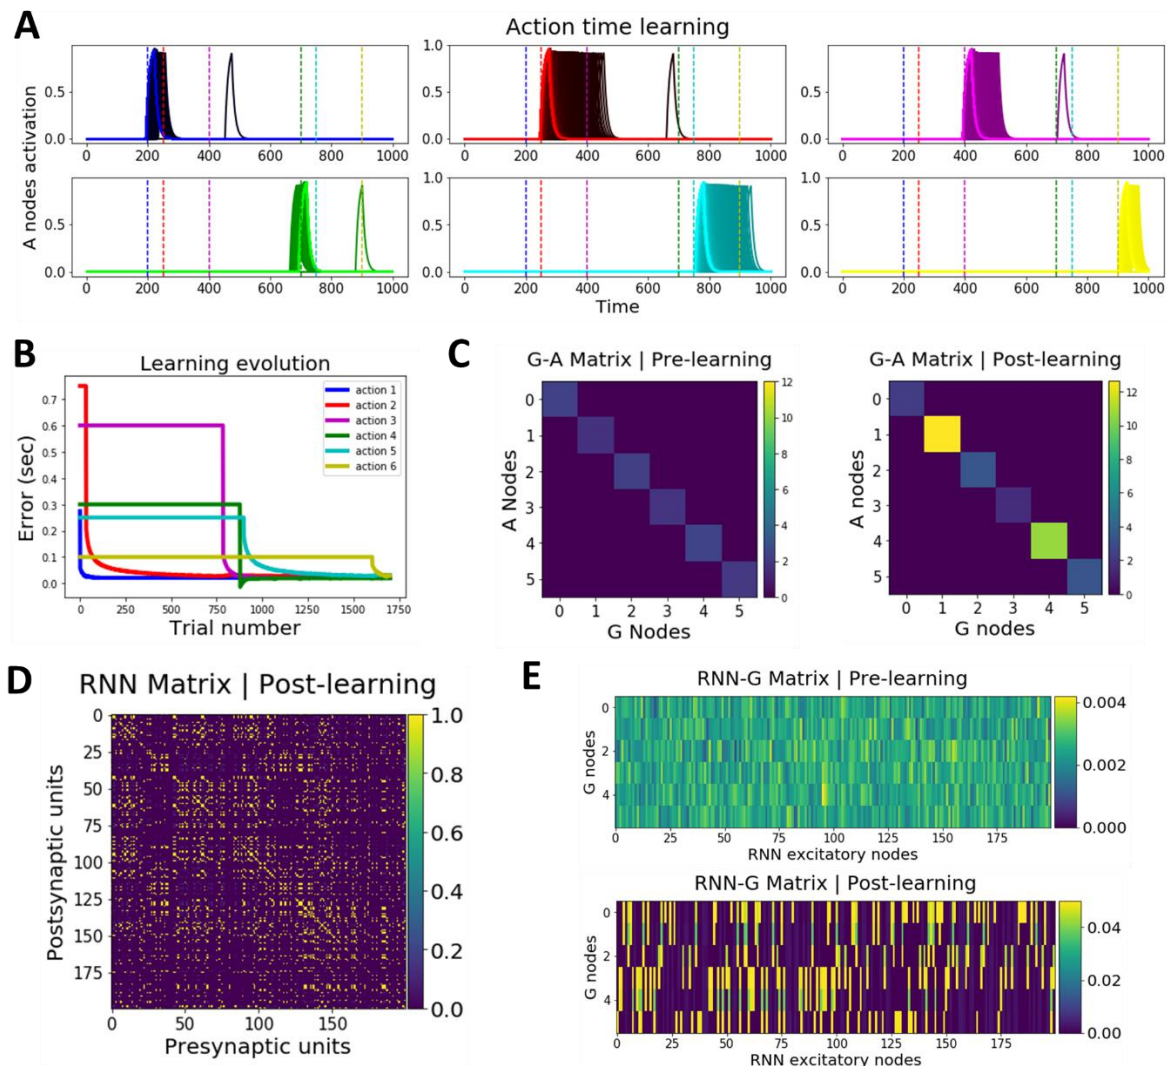

328

329 **Figure 2. ACDC's learning dynamics. A. Learning a precisely timed action sequence.** Each action  
 330 execution (A node activation) is progressively shifted towards the optimal action time (depicted by the  
 331 color coded vertical dashed line; x-axis represents time). Learning progresses from darker to brightest  
 332 colors. **B. Learning evolution.** Color coded traces represent the evolution of the error as a function of  
 333 trial number for each action in the sequence. Learning unfolds sequentially, whereby timing errors are t  
 334 minimized for the first action before the second action starts learning. Therefore, each action (except  
 335 action 1) starts off with a plateaued error level until the preceding action reaches the optimal time.  
 336 Some action timings are learned faster than others because their optimal time weight value is closer to  
 337 their initial value. The error is computed by subtracting the observed from the desired response time  
 338 and plotted in seconds. **C. BG weights encode time.** Action timing is learned by changing the weights  
 339 from BG Go nodes to thalamus Action nodes. The left and right panel show respectively the weights  
 340 values before and after learning. For instance, the second action (red trace in B) starts off being  
 341 produced too slowly. Hence, weights increase until they produce the optimal action time for action 2.  
 342 Color bars indicate weight values. **D. RNN connectivity matrix after learning.** The RNN connectivity  
 343 matrix is initialized as a blank slate (all values are set to 0). After learning, the RNN connectivity matrix

344 displays the appearance of clusters, whereby groups of 20 neurons are fully interconnected with each  
345 other and not connected with other neurons in the RNN (please refer to Video 2 and Fig. 7A for better  
346 visualization of clusters and their transitions as the sequence unfolds). Color bar represents weight  
347 values. **E. RNN  $i^{\text{th}}$  cluster learns to project to  $j^{\text{th}}$  Go node.** The top panel shows the randomly initialized  
348 weight values between the RNN excitatory units (before learning). The bottom panel shows how each  
349 cluster (represented by a subset of RNN neurons) is connected to a specific Go node after learning. Color  
350 bars represent weight values.  
351

## 352 ***Temporal flexibility properties of the ACDC model***

353 Having established learned clusters within the RNN and learned sequences in the ACDC model, we now  
354 focus on the flexibility properties of the model after learning, without having to overwrite learned  
355 weights. First, we show that a previously learnt action sequence with *temporal asynchrony* can be  
356 flexibly reproduced. Second, we show that this sequence can be initiated earlier or later in time; we call  
357 this property *temporal shifting*. Third, we demonstrate how action sequences can be compressed or  
358 dilated, i.e., *temporal rescaling*. Fourth, we show how a given ordered sequence can be produced with a  
359 completely different tempo, a property that we refer to as *temporal compositionality*. Fifth, we describe  
360 how the model can also output sustained action execution. Finally, we show how the ACDC model can  
361 learn (a part of) the Thunderstruck song, which is then flexibly played on a bossa nova tempo; thereby  
362 recapitulating the temporal flexibility properties.

363 **Simulation 2: Reproduction of previously learnt action sequence displaying temporal asynchrony.** In  
364 simulation 1, we demonstrated that the ACDC model can learn precisely timed, temporally  
365 asynchronous, action sequences. In simulation 2, we now clamp learning (i.e., freeze the weights). We  
366 provide the network with the same input and observe that the network can reproduce the sequence  
367 maintaining its precision in action timing. Figure 3A shows that, given the clamped set of learned  
368 weights, each Action node (color coded for order) within the thalamus layer gets activated at the  
369 previously learnt precise timing, in a phasic/transient fashion.

370 **Simulation 3: temporal shifting.** The previous action sequence can be shifted in time, i.e., started earlier  
371 or later. Importantly, this shift can occur without changing the timing between actions (i.e., sequence  
372 timing is preserved). The ACDC model achieves flexible temporal shifting by either adding an additional  
373 positive (to start the sequence earlier) or negative (to start it later) input to the first Go node of the  
374 sequence, analogous to the top-down input from pre-SMA to striatum thought to bias starting points for  
375 evidence accumulation (Forstmann et al., 2008; although similar effects could be implemented by



376 dopaminergic modulation; see Discussion). In simulation 3, we inject an additional input of +1 or -1 to  
377 the first Go node during the first 100 ms of the 1 second time window. Figure 3B shows how the  
378 sequence is shifted earlier in time for the positive input (left panel) and later in time for the negative  
379 input (right panel). Moreover, figure 3C shows that as this additional input lasts longer, the distance (in  
380 time) between the first action of the shifted sequence and that of the original sequence increases  
381 linearly. Naturally, intrinsic temporal constraints of the model limit this distance for earlier shifts, as  
382 shown by the negative plateau in figure 3C (black circles).

383 **Simulation 4: Temporal rescaling.** Musicians possess the ability to learn a rhythm, i.e., a precisely timed  
384 action sequence, and instantly temporally rescale (compress or dilate) that rhythm without additional  
385 learning. In our model, flexible rescaling is achieved by sending a multiplicative input ( $\rho$ ) to all Go nodes  
386 simultaneously; if  $\rho > 1$  or  $0 < \rho < 1$  the sequence is respectively compressed or dilated. Figure 3D shows  
387 temporal rescaling for  $\rho$  values of 1.2 (compression, left panel in Fig. 3D) and 0.9 (dilation, right panel in  
388 Fig. 3D). Importantly, temporally rescaling the sequence does not affect the temporal structure of action  
389 sequences. For 100 values of  $\rho$ , ranging from 0.9 to 1.2, we computed the relative ratio between a  
390 sequence of 3 actions. The ratio was computed by subtracting the time of action 1 from that of action 2  
391 (subtraction 1), then the time of action 2 from that of action 3 (subtraction 2), and dividing subtraction 2  
392 / subtraction 1. We performed this computation for the action triplets 1-2-3, 2-3-4, 3-4-5 and 4-5-6, and  
393 summed the ratios. Figure 3E shows that this sum of ratios stays constant (mean = 7.5, s.d. = 0.12),  
394 thereby indicating that temporal structure is maintained albeit rescaled.

395 **Simulation 5: Temporal compositionality.** Musicians must also be capable of temporal compositionality;  
396 that is, apply a different tempo to an action sequence that was learned in a different tempo (e.g., apply  
397 a bossa nova tempo to a rock song; see below). In simulation 5, we assume that the brain can extract  
398 and store a tempo, which then can be used as a dynamical multiplicative signal to all Go nodes as in  
399 simulation 4. In simulation 5, we apply a dynamical multiplicative signal (Fig. 3F right panel) to the Go  
400 nodes. The result is to produce the learned sequence (described in Fig. 3A) to the tempo described by  
401 the multiplicative signal. Figure 3F (left panel) shows how the time of each action in the sequence does  
402 not fall on the previous tempo (color coded vertical dashed lines), but now rather is produced at the  
403 novel timing (vertical solid lines).

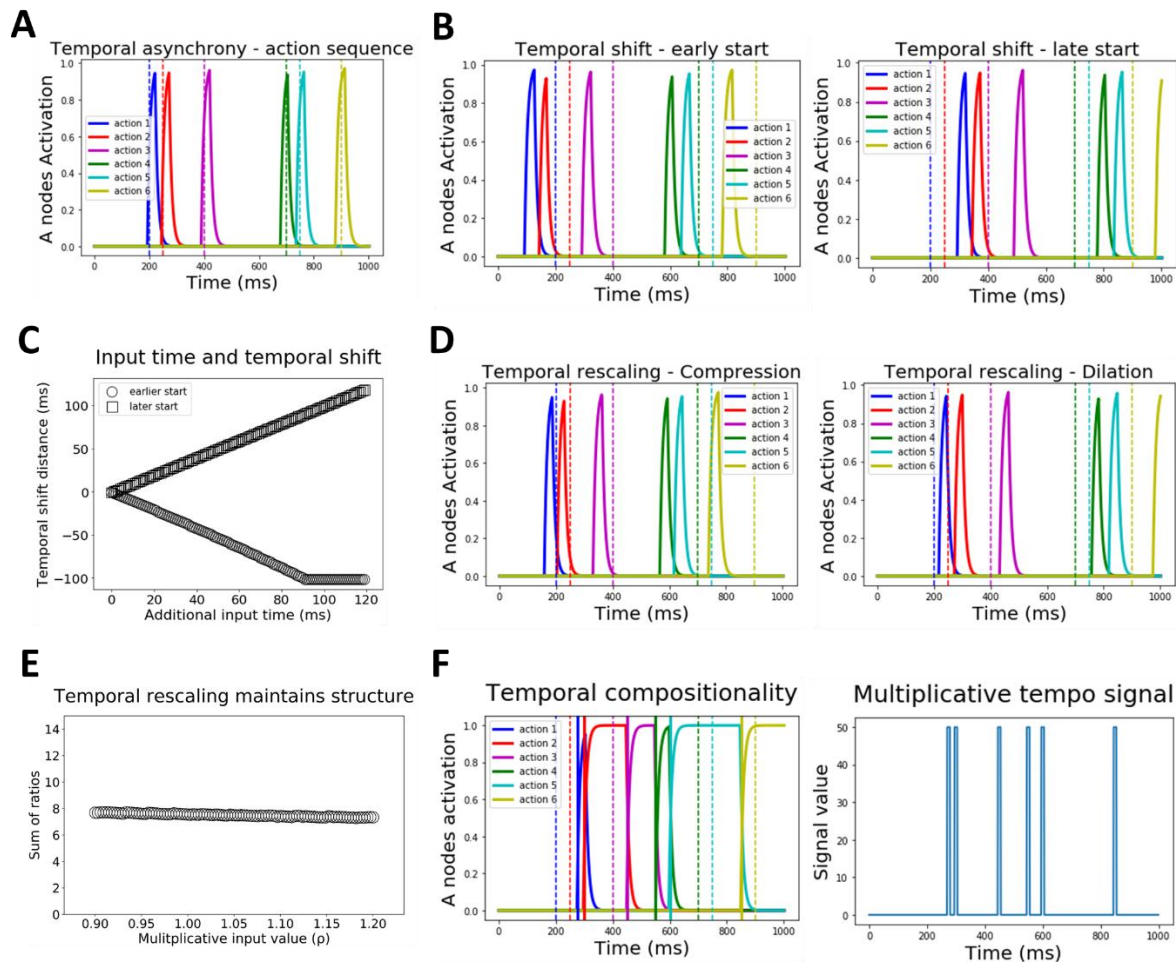

404

405 **Figure 3. Temporal properties of the ACDC model. A. Simulation 2: Reproduction of action sequence**  
 406 **with temporal asynchrony.** Each action (i.e. A node activation, color coded) is produced at the precise  
 407 desired time indicated by the vertical dashed line (also color coded), within a 1 second time window.  
 408 Inter-action interval varies as the sequence unfolds. **B. Simulation 3: Temporal shifting.** A precisely  
 409 timed action sequence can be started earlier (left panel) or later (right panel) by respectively injecting an  
 410 additional positive or negative input to the first G node (i.e. associated to accumulating evidence in  
 411 favor of the first action). Importantly, the temporal structure of the action sequence is not altered. **C.**  
 412 **Simulation 3: Temporal shifting varies linearly with additional input time.** Applying longer input times  
 413 leads to increasingly earlier or later shifts in sequence initiation times, depending on whether additional  
 414 input is positive (circles) or negative (squares). **D. Simulation 4: Temporal rescaling.** Action sequences  
 415 can be compressed (left panel) or dilated (right panel) by adding a multiplicative input to all G nodes  
 416 simultaneously. **E. Simulation 4: Temporal rescaling preserves action sequence structure.** Importantly,  
 417 when temporal rescaling is applied to the action sequence, the relative timing between each action (i.e.  
 418 the structure) is preserved. Here, we plot the sum of ratios (y-axis, see main text) as a function of the  
 419 multiplicative input  $\rho$  (x-axis). The sum of ratios value (black circles) stays constant as a function of  $\rho$ ,  
 420 indicating a preserved temporal structure even though the sequence is rescaled. **F. Simulation 5:**  
 421 **Temporal compositionality.** The left panel shows how A nodes activity are activated on the tempo  
 422 described by the multiplicative signal (left panel). Vertical dashed and solid lines on the left panel



423 indicate the timing of each action for the previous and novel tempo respectively. As shown, the  
424 respective A nodes become active on the novel tempo.

425

426 **Simulation 6: Sustained motor activation.** The ACDC model is also capable of producing sustained  
427 motor activation for any element within the sequence, for instance sustained notes in a musical scale.  
428 Our model can achieve sustained motor activation via two mechanisms. First, via a flexible mechanism  
429 similar to that of rhythm compositionality, a multiplicative signal ( $\rho = 0.1$ ) is sent to the Go node during  
430 the period in which sustained motor activation is needed. On the left panel of figure 4, we show the  
431 results of applying such a signal during the period between the start of the second action and the  
432 beginning of the third one. The motor activation of the second Action node (red trace) is sustained until  
433 the third action is executed (purple trace). Second, via a learning mechanism, the weight value between  
434 a specific Action-No Go nodes pair can be decreased to induce sustained activation of the Action node.  
435 On the right panel of figure 4, we decreased the weight value connecting the third Action-No go nodes  
436 pair. Such a weight change produced a similar result to that of implementing a multiplicative input to  
437 the No Go node, i.e. sustained activation of the corresponding Action node.

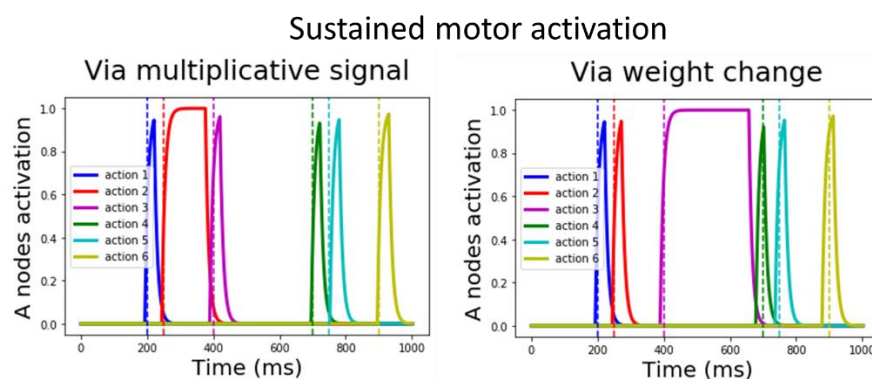

438

439 **Figure 4. Simulation 6: Sustained motor activation.** Both panels demonstrate that the ACDC model is  
440 able to output sustained motor activation as desired within a sequence. The left panel shows the results  
441 of applying a multiplicative signal ( $\rho = 0.1$ ) to the second No Go node, inducing a sustained activation of  
442 the second action (red trace). The right panel shows a similar effect this time by decreasing the value of  
443 the Action-No Go connection of the third action, in turn inducing sustained activation of the third Action  
444 node (purple trace).

445 **Simulation 7: The ACDC model in action and sound.** Here, the ACDC model learns to produce the  
446 second guitar riff of ACDC's (the rock group) Thunderstruck song. This riff is composed of 16 actions  
447 hitting six different notes (B5, A5, G#5, F#5, E5, D#5) following an isosynchronous rock tempo (Fig. 5A).  
448 By allowing the model to record each note corresponding to each sequential action (following Fig. 5A),

449 the ACDC model was able to musically reproduce the riff ([Audio file 1](#)). Notably, [video 1](#) shows that the  
450 RNN dynamics (during the song) represent sequential attractor states, encoding order and leading to the  
451 production of each action (and sound) in the sequence (for a slowed down demonstration of similar  
452 dynamics with a less complex action sequence see Video 2 below). Next, we imposed the ACDC model to  
453 play the riff but now based on a bossa nova tempo without further training (Fig. 5B). The ACDC model  
454 was able to flexibly reproduce the riff following the bossa nova tempo (Fig. 5C and Audio file 2). The  
455 model thereby displays the ability to produce complex temporal compositionality. Further note that,  
456 altogether, this simulation encapsulates distinct temporal flexibility properties. First, flexibly  
457 reproducing the Thunderstruck song following a bossa nova tempo requires the ability to generate an  
458 action sequence with temporal asynchrony. Second, temporal rescaling is applied to parts of the song as  
459 the sequential execution of consecutive notes need to be sped up or slowed down. Third, the model  
460 displays its ability to produce sustained motor activation (see [Audio file 2](#)).

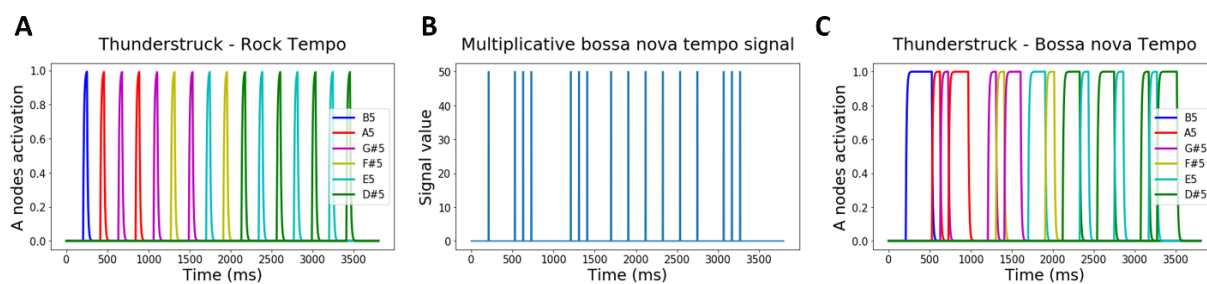

461

462 **Figure 5. Simulation 7: the ACDC produces the Thunderstruck song. A. Second guitar riff from ACDC's**  
463 **(the group) Thunderstruck song.** The riff is composed of 16 sequential actions creating a isosynchronous  
464 rock rhythm over a window of 3500 ms (given a 140 bpm tempo). Each action is associated to a color  
465 coded note). **B. Generic bossa nova tempo.** We imposed the model to replay the thunderstruck rock  
466 tempo song following a bossa nova rhythm whose tempo is described by the blue trace multiplicative  
467 signal. **C. Flexible generation of the Thunderstruck song following a bossa Nova tempo.** When the  
468 multiplicative input (Fig. 3B) is given to the Go nodes of the BG, the ACDC model flexibly reproduces the  
469 Thunderstruck song but now following the bossa nova tempo.

470

471 --Insert Video 1--

472 **Video 1. Simulation 7: Dynamical visualization of RNN and Action nodes activity coupled with**  
473 **simulation-based Thunderstruck song sound.** The top left panel shows how RNN sequential and  
474 persistent activity unfolds as a function of time. The bottom left panel is a visualization of RNN dynamics  
475 as a neural trajectory in PC space. The neural trajectory displays a pattern of sequential attractor states.  
476 The right panel displays how activity in each Action node (and hence Thunderstruck song note) is  
477 executed at the learned action time.

478

## 479 **Behavioral and neurophysiological simulations**

480 **Simulation 8: Behavioral simulation.** In the motor timing literature, a ubiquitous finding is *scalar*  
481 *variability*: when asked to produce an action after a specific time interval, the variability in action  
482 execution timing increases with the length of interval timing (Ivry and Hazeltine, 1995; Rakitin et al.,  
483 1998; Jazayeri and Shadlen, 2010; Acerbi et al., 2012). In simulation 8, our model learns to produce a  
484 single action at distinct interval timings (i.e. 200, 400, 600 and 800 ms). For each timing, the model  
485 produces 500 reaction times (RTs), from which we extract the standard deviation (SD), and reproduce  
486 this process for 100 simulations and two noise values (i.e. gaussian random noise with zero mean and SD  
487 of 0.01 or 0.05 is added to the model equations 3-5 and 7). As predicted by empirical work, figure 6  
488 shows how the SD of RTs increases as a function of interval timing for both noise values, and thereby  
489 demonstrates that the ACDC model displays scalar variability (see also Egger et al., 2020). Furthermore,  
490 the SD value range also increases with noise values. This effect is explained in our model by having a  
491 fixed negative bias on the Action nodes in the motor layer. Such a feature reduces to having an  
492 accumulation-to-bound process for action execution. Hence, given a specific amount of noise, longer  
493 RTs are associated to wider RT distributions (i.e. larger SD, Ratcliff and Rouder, 1998). The underlying  
494 reason is that the effect of noise on evidence accumulation is amplified as time elapses.

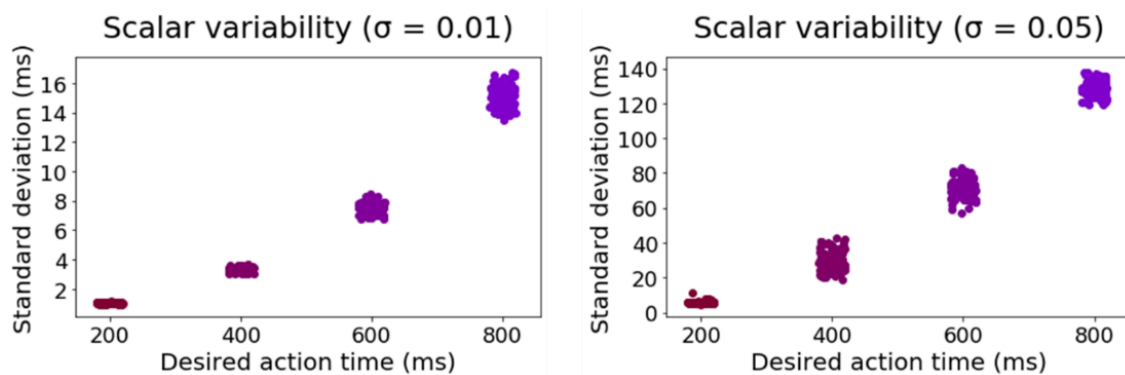

496 **Figure 6. Simulation 8: The ACDC model displays scalar variability.** Left (low noise value = 0.01) and  
497 right (high noise value = 0.05) panels show that the standard deviation of RTs increases as a function of  
498 the desired action time (i.e. interval timing). Moreover, higher noise values increase the range of  
499 standard deviation. Each dot is the result of 1 out of 100 simulations for each interval timing.

500 **Simulation 9: Neurophysiological simulations.** Two other ubiquitous findings are persistent and  
501 sequential neural activity. First, several studies have observed persistent neuronal firing rates in  
502 temporal (Miyashita and Chang, 1988; Nakamura and Kubota, 1995; Erickson and Desimone, 1999),  
503 parietal (Koch and Fuster, 1989; Chafee and Goldman-Rakic, 1998; Gail and Andersen, 2006; Klaes et al.,

504 2011), premotor (Cisek and Kalaska, 2005) and prefrontal (Funahashi et al., 1989, 1990; Miller et al.,  
505 1996) cortices whenever an agent has to hold in working memory task-relevant stimulus features (e.g.,  
506 spatial location). Theoretical work suggests that persistent activation patterns emerge from recurrently  
507 connected networks that settle in one of multiple potential attractor state (Durstewitz et al., 2000;  
508 Wang, 2001; Brunel, 2003). Second, as motivated in the introduction, sequential activity has also been  
509 observed in distinct sequential behaviors such as spatial navigation (Eichenbaum, 2014) and bird song  
510 (Hahnloser et al., 2002; Kozhevnikov and Fee, 2007; Amador et al., 2013; Okubo et al., 2015).

511 Interestingly, recent work suggests that sequential switches in attractor states (and hence persistent  
512 neural activity), are associated to the timing of behavioral switches in action sequences (Recanatesi et  
513 al., 2020). Therefore, persistent and sequential activity may emerge from the same mechanism. In our  
514 model, the RNN activation dynamics display such switches from one attractor to another as the action  
515 sequence unfolds. Each attractor state is associated to the persistent activity of neurons forming a  
516 cluster in the PMC (RNN). When the action associated to that attractor state (i.e. the  $j^{th}$  action  
517 associated to the  $j^{th}$  order) is executed, this triggers a switch in attractor state in the RNN (via cortico-  
518 cortical projections from M1 to PMC), as empirically observed by Recanatesi et. al (2020). In simulation  
519 1, the ACDC learns to produce an arbitrary sequence of 6 actions, each with their own desired execution  
520 time within a window of 1 sec (i.e. at 200, 250, 400, 700, 750, 900 ms). Figure 7A shows the RNN  
521 dynamics after learning. Each cluster of activation displays persistent neural activity until the action is  
522 executed, which triggers the following cluster of persistent neural activity. Hence, activity in the RNN is  
523 both persistent and sequential in nature.

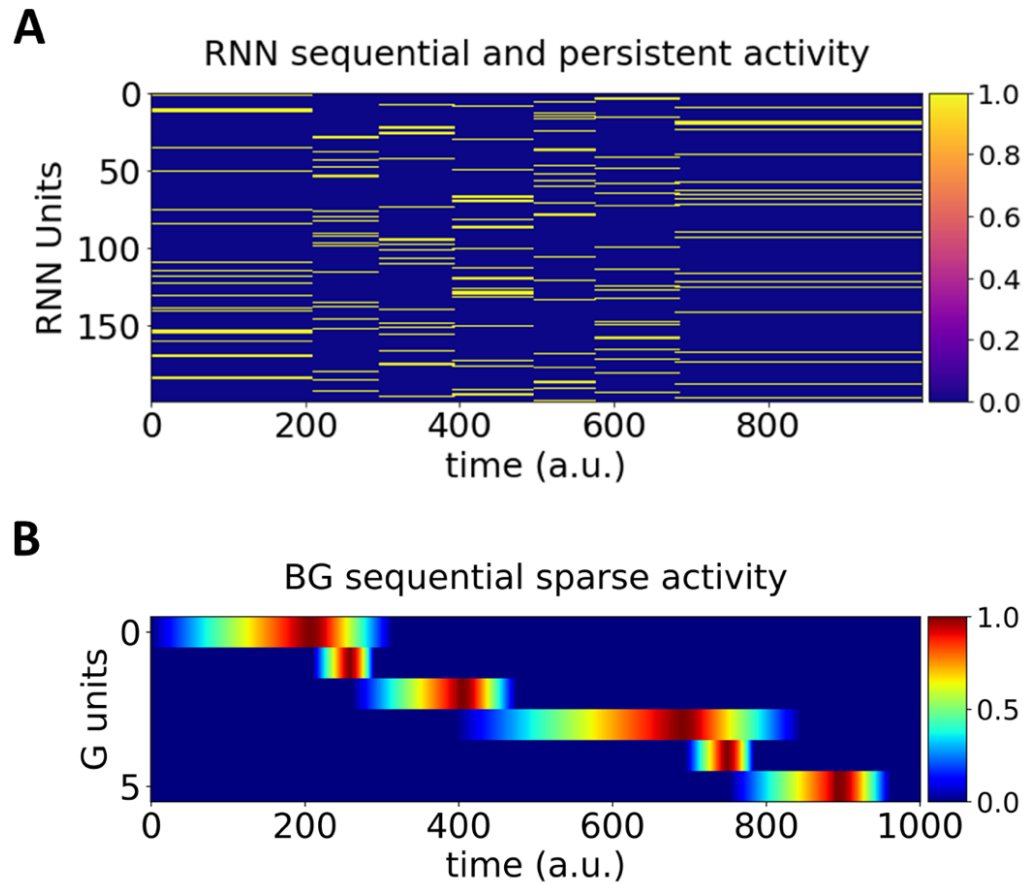

524

525 **Figure 7. Simulation 9: A. Sequential and persistent activation of clustered neural populations within**  
526 **the RNN.** The y-axis represents each RNN unit, the x-axis represents time. The first cluster is activated by  
527 the input layer, and maintains persistent activity until the first action is executed. At that moment, via  
528 excitatory projections from the Action nodes (Fig. 1C) to the following ( $i+1^{th}$ ) cluster in the RNN (Fig. 1B)  
529 gets activated, and thus displays persistent activation, and so forth via the cortico-basal ganglia loops  
530 (light blue arrows in Fig. 1). Color bar represents firing rate. **B. Sequential and sparse activation in the**  
531 **BG.** The y-axis represents the G unit activity over time (x-axis). Each G unit responds in a sequential and  
532 transient manner, as has been shown in neurophysiological single-cell recordings of the BG (e.g., Gouvêa  
533 et al., 2015). Color bar represents normalized firing rate.

534 To gain better visual intuition on the RNN dynamics, we performed dimension reduction on the row  
535 space of the unit (i.e., neuron) by time matrix displayed in figure 7A. We then dynamically plotted the  
536 first 3 principal components (PCs) as a function of time. [Video 2](#) shows that each cluster of persistent  
537 neural activity acts as an attractor state (within the highly dimensional space of the RNN), and the  
538 dynamics in the RNN switch from one attractor to the other when an action is executed, again displaying  
539 both persistent and sequential neural dynamics.

540

--Insert Video 2--

541 **Video 2. Simulation 9: Dynamical visualization of RNN and Action nodes activity.** The left panel shows  
542 how activity in each Action node is executed at the learned action time, each color represents the  
543 activation of a specific A node in the thalamus. Given the structure and mechanism described in figure 1,  
544 the right panel displays the neural RNN trajectory showing that each action execution triggers a switch  
545 from the  $i^{th}$  to the  $i^{th+1}$  attractor state.

546 The qualitative pattern of the RNN sequential and persistent dynamics (Fig. 7A) is different than  
547 observed in rodent (Harvey et al., 2012; Eichenbaum, 2014; Mello et al., 2015) or monkey (Jin et al.,  
548 2009) neurophysiological recordings, which reveal sequential sparse activation (individual neurons  
549 display quick and transient activation as behavior unfolds). Notably however, the Go nodes in the BG  
550 module of our model display qualitatively similar sequential and sparse activation patterns as that seen  
551 empirically in the BG (Fig. 7B; see figures 2A, 3B, 1E, 8C, respectively of Mello et al., 2015; Rueda-Orozco  
552 and Robbe, 2015; Bakhurin et al., 2017; Dhawale et al., 2017)

## 553 Discussion

554 We have presented a neurocomputational model combining the strength of associative chains (e.g.,  
555 Pereira and Brunel, 2020) and cluster-dependent (e.g., Maes et al., 2020) models, while also providing a  
556 model of how the BG contribute to recurrent cortical dynamics in sequential behaviors. Our model  
557 factorizes action order, identity, and time, which are represented in distinct loci of the cortico-basal  
558 ganglia neural network. Crucially, factorizing these features provides the network with the ability to  
559 independently manipulate the building blocks of precisely timed action sequences, thereby increasing  
560 the computational power of our model. This increased power is illustrated through several interesting  
561 emergent properties. First, we demonstrated that the ACDC model can learn and reproduce precise  
562 spatiotemporal action sequences with temporal synchrony or asynchrony (i.e., constant or varying inter  
563 action intervals). Second, our model displays several flexibility properties: temporal shifting, rescaling  
564 and compositionality, and sustained motor activation; culminating in our model's ability to reproduce  
565 the Thunderstruck song and change it to a bossa nova tempo. Third, the model can account for  
566 behavioral and neurophysiological empirical observations.

### 567 *Encoding order as attractor state switches in the RNN*

568 Recent work suggests that dynamic representations can be understood as switches in activity of neural  
569 networks (Ju and Bassett, 2020). Within this framework, one can envision action sequences as neural  
570 states unfolding over time. By analyzing the neural activity of secondary motor cortex in rodents,  
571 Recanaseti et al. (2020) showed that sequential behavior was subtended by the sequential unfolding of

572 attractor states, whereby each action in the sequence was subtended by a particular attractor state.  
573 Furthermore, these authors were able to model variability in action timing by adding correlated noise to  
574 the dynamics of a RNN. This addition allowed their RNN to display dynamics that jump from one  
575 attractor state to another, but at random times (hence explaining the variability in action timing). Our  
576 model is based on a similar mechanism. The dynamical activity of the RNN reflects switches in attractor  
577 states induced by excitatory projections to the RNN that transiently modify its E-I balance. However, via  
578 BG learning and modulation, our model precisely controls the switch to another cortical attractor state,  
579 thereby influencing output timing. Within our conceptualization, we suggest that persistent activity  
580 within a cluster indicates the latent state that the system is in (e.g., Collins and Frank, 2013), which in  
581 this case reflects the ordinal position in the sequence. Moreover, in contrast to previous models, the  
582 clusters themselves were not assumed to be anatomically hard-wired but emerged within the RNN via  
583 learning.

584 Alternative models have proposed different mechanisms for encoding ordinal position. Some models  
585 possess a temporal context layer whose state is modified dynamically as time passes. The nature of this  
586 activity can take the form of a cyclical signal (Hartley and Houghton, 1996), decaying start signal (Page  
587 and Norris, 1998), or a sequence of overlapping states (Burgess and Hitch, 1999, 2006). Other models  
588 assume that the network input (used to learn the sequence) is itself sequential in nature (Murray and  
589 Escola, 2017; Maes et al., 2020), and learning the spatiotemporal signal depends on the sequential  
590 nature of the input. Our model is free of this assumption; the network input is a single pulse of  
591 activation, but can nevertheless reproduce a precisely timed spatiotemporal signal. This ability emerges  
592 from the feedback loop from thalamic Action nodes to the cortical RNN, triggering transitions to a  
593 subsequent cortical attractor. One can therefore consider motor output as part of the teaching input  
594 signal to the RNN; because motor activation unfolds sequentially in our model, the sequential nature of  
595 the teaching signal emerges from our network architecture.

596 Interestingly, the idea that the motor cortex (presumably via motor thalamus neurons) acts as a  
597 teaching signal to other brain areas has received strong support from rodent lesion studies. For instance,  
598 rats are unable to learn a precisely-timed lever press when their M1 cortex is lesioned (Kawai et al.,  
599 2015), and transiently inactivated or disturbed via optogenetic manipulation (Otchy et al., 2015). More  
600 generally, the notion that motor output can influence cognitive representations and transitions is  
601 consistent with the emerging literature on how cognitive functions scaffold on top of motor functions in  
602 cortico-basal ganglia circuits (Koziol and Budding, 2009; Collins and Frank, 2016a).



603 ***Motor sequence flexibility as inputs to the basal ganglia***

604 Humans can adapt their motor output almost instantaneously given external or internal stimuli. For  
605 instance, musicians can modify the tempo of a song upon signaling of the conductor. Such flexibility  
606 necessarily needs to stem from fast reconfiguration of neural dynamics, rather than emerge from  
607 changes in networks weights (Remington et al., 2018). Murray and Escola (2017) proposed a model of  
608 interconnected medium spiny neurons in the striatum that can apply such dynamic reconfiguration. In  
609 particular, their model could perform temporal rescaling of sparse sequential activity. Yet, flexibility in  
610 this model is constrained to isosynchronous sequences (see also Egger et al., 2020; Kozachkov and  
611 Michmizos, 2020)(see also Egger et al., 2020). However, a recent model making use of eligibility traces  
612 (Florian, 2007; Izhikevich, 2007; Frémaux et al., 2010; Soltoggio and Steil, 2013; Bellec et al., 2019),  
613 manages to learn precise non-isosynchronous spatiotemporal sequence learning (Cone and Shouval,  
614 2021). Still, it is unclear how such a model can rescale non-isosynchronous sequences, and neither of  
615 these models is capable of exhibiting temporal compositionality. Crucially, the ACDC model can perform  
616 temporal rescaling for both isocynchronous and non-isosynchronous sequencing, and it can also flexibly  
617 switch the tempo altogether through a multiplicative signal to the BG.

618 The temporal properties of our model discussed in the previous paragraph emerge from additional  
619 inputs to the BG. What is the nature of this input? One possibility could be dopaminergic. Indeed,  
620 midbrain dopaminergic nuclei massively broadcast to the striatum (Watabe-Uchida et al., 2017), and  
621 several studies have implicated dopamine in controlling movement vigor (Beierholm et al., 2013; Hamid  
622 et al., 2015, 2021; Panigrahi et al., 2015; Zénon et al., 2016; Berke, 2018; Gaidica et al., 2018; Sedaghat-  
623 Nejad et al., 2019; Augustin et al., 2020). Dopamine has also been extensively implicated in impulsive  
624 (i.e. pathologically speeded) behavior (van Gaalen et al., 2006; Frank et al., 2007; Pattij and  
625 Vanderschuren, 2008; Buckholtz et al., 2010; Pine et al., 2010; Dalley and Roiser, 2012; Economidou et  
626 al., 2012). Furthermore, administration of amphetamine and haloperidol to human participants,  
627 respectively increasing and decreasing tonic dopamine levels, has been associated to faster and slower  
628 response times during a simple reaction time task (Lake and Meck, 2013).

629 If dopamine can flexibly modulate (i.e. speed up or slow down) action execution timing, the question  
630 remains upon which psychological process this neuromodulatory effect takes place. Within the  
631 accumulation-to-bound framework (Ratcliff, 1978; Ratcliff and Rouder, 1998), this effect could  
632 potentially alter two distinct processes. First, dopamine could play a role on the speed (or rate) of  
633 evidence accumulation. In line with this hypothesis, several studies have highlighted a clear effect of



634 dopamine on the drift rate of evidence accumulation in perceptual (Yousif et al., 2016; Beste et al.,  
635 2018) or reward-based (Westbrook et al., 2020) decision-making tasks. Our model implements this  
636 possibility. Indeed, inputs to Go nodes modify (i.e. increase or decrease) the drift rate of evidence  
637 accumulation. Yet, the speed at which an action is produced also depends on the response threshold,  
638 with lower thresholds increasing speed at the expense of accuracy (Heitz, 2014). Therefore, a second  
639 alternative is that dopamine or other BG modulations may modify the threshold of action execution  
640 (Wiecki and Frank, 2013; Lloyd and Dayan, 2015). Interestingly, Parkinson's disease patients on  
641 subthalamic deep brain stimulation tend to behave impulsively (Frank et al., 2007), due to modulation of  
642 the decision threshold (Frank, 2006; Cavanagh et al., 2011; Herz et al., 2016). Naturally, both hypotheses  
643 are not mutually exclusive; further research should investigate the effects of dopaminergic and  
644 subthalamic modulations regarding motor sequence flexibility.

### 645 ***Biological basis and learning***

646 In line with recent models (Murray and Escola, 2017; Maes et al., 2020; Cone and Shouval, 2021), the  
647 ACDC model implements a certain level of biological plausibility, and still is able to capture a plethora of  
648 data both at the neurophysiological and behavioral level. For instance, we demonstrate that the model  
649 can replicate sequential sparse activation observed within the basal ganglia (Gouvêa et al., 2015).  
650 Another model making use of RNNs set at a near chaotic regime (Rajan et al., 2016) has been able to  
651 replicate sparse sequential activations as recorded in mice parietal cortex during spatial navigation  
652 (Harvey et al., 2012). Yet, training in these networks is based on highly supervised mechanisms that are  
653 not biologically plausible (Sussillo and Abbott, 2009; Laje and Buonomano, 2013; Hardy et al., 2018).  
654 Therefore, future research should analyze whether more biological plausible RNNs (see Miconi, 2017)  
655 can reproduce such action patterns. Note that some of the implementation details of our model have  
656 still to be worked out (see limitations section below).

### 657 ***Encoding and executing multiple sequences***

658 One important advantage of cluster-based models is the potential to encode multiple sequences within  
659 the same network of interconnected neurons. Within our model, this would tantamount to having  
660 several sequential attractor state neural trajectories, each of which subtends the execution of one  
661 specific action sequence. Therefore, action sequence selection is seen as targeting a specific cluster of  
662 units within the RNN, leading to the execution of the corresponding sequence. Moreover, the ability to  
663 produce various sequences simultaneously would reduce to simply activating more than one cluster  
664 (Murray and Escola, 2017).

665 Another important question focuses on investigating how sequences are chained one after the other in  
666 order to produce adaptive behavior. Neurophysiological recordings in mice have revealed the existence  
667 of specific neural codes during sequences that signal the beginning and end (or boundaries) of a  
668 sequence (Jin et al., 2014; Jin and Costa, 2015). These go and stop signal may be used to signal the  
669 system to transition from one neural trajectory to the other, thereby allowing action sequences to be  
670 chained (Logiaco et al., 2019).

### 671 ***Limitations and future directions***

672 As previously noted, some of the implementation details of our model have still to be worked out. For  
673 instance, reinforcement learning of action timing is conceptually thought to take the form of a tri-factor  
674 hebbian learning rule (Montague et al., 1995; Bailey et al., 2000; Izhikevich, 2007; Hoerzer et al., 2014;  
675 Miconi, 2017), where neurons subtending a rewarding behavior (and hence forming a specific cortical  
676 activity patterns) increase their connectivity to D1 receptor striatal populations (also known as Go cells)  
677 via dopaminergic activity bursts stemming from midbrain nuclei (Frank, 2005; Collins and Frank, 2013).  
678 Our implementation is slightly different. Reinforcement is shifted later in the information processing  
679 pipeline, and action time learning takes place between Go nodes (which we also consider as D1 receptor  
680 cells in the striatum) and thalamic motor neurons. We applied a delta rule within the BG-thalamus  
681 module. Much evidence indicates that the BG learn via reinforcement learning (e.g., McClure et al.,  
682 2003; O'Doherty et al., 2004; Badre and Frank, 2012), but the brain also makes use of signed errors for  
683 precise timing e.g., in the cerebellum. Our learning rule in the BG-thalamus thus summarizes the  
684 contributions of these systems in conjunction. In contrast, classical Hebbian learning rule was applied  
685 within the RNN and between the RNN and BG. Indeed, these projections simply carry “chaining”  
686 information (i.e. they allow for the sequential structure of the chain to emerge during learning), and  
687 therefore do not need to be fine-tuned to a specific value for the emergence of precise action timing.  
688 Future work should consider both biological learning constraints and implement a more detailed  
689 architecture of the basal ganglia networks.

690 Moreover, future work on the ACDC should focus on investigating the limits with which RNNs can  
691 encode multiple sequences without creating interference. This entails exploring two aspects of the  
692 model. First, our model forces orthogonalization of the inputs to the RNN in order to make sure that no  
693 clusters are interconnected. Novel versions of the ACDC need to investigate how this orthogonalization  
694 may emerge from specific learning rules. Second, cluster size matter, as bigger cluster size may be more  
695 robust to noise. Therefore, given an initial number of RNN excitatory neurons, only but a limited amount

696 of sequences can be encoded. Therefore, the interaction between learning, cluster size and sequence  
697 interference should also be investigated more systematically.

698 Our model simulates action sequences such as those needed to play the guitar or the piano. Within this  
699 context, each action is represented as a discrete entity. However, many daily life action sequences are  
700 subtended by more continuous actions, as for instance when playing violin with a bow. The ACDC could  
701 be expanded by having more continuous representations of action plans and execution in our BG-  
702 thalamus module. Based on dynamic field theory, one potential approach would be to represent actions  
703 as dynamic neural fields (Erlhagen and Schöner, 2002; Cisek, 2006; Klaes et al., 2012), which have been  
704 shown to successfully model more continuous reaching actions (Christopoulos et al., 2015). Moreover,  
705 these continuous action representations in the BG may require additional inputs from the cerebellum  
706 for movement coordination (Thach et al., 1992) or sequence prediction for motor control (Bastian,  
707 2006).

708 Finally, recent research focused on how humans extract abstract knowledge, and generalize this  
709 knowledge to other situations (Collins and Frank, 2016b) (Collins and Frank, 2013; Whittington et al.,  
710 2020; Baram et al., 2021). Indeed, abstracting the action sequence structure of the Thunderstruck song  
711 may be useful for future learning. Transferring the abstract structure of the Thunderstruck song when  
712 learning a novel song that shares a similar structure should improve learning (Lehnert et al., 2020).

713

## Conclusion

714 Separating time and order information in two distinct loci of a biologically inspired model of action  
715 sequences allowed us to increase computational power, and to capture a significant amount of data at  
716 the neurophysiological and behavioral levels. Although some specific aspect of the implementation of  
717 this functional specialization need still to be resolved, we demonstrate that such an architecture  
718 increased motor flexibility. We propose a concrete and tractable mechanism of this flexibility, and thus  
719 suggest a model of how humans and animals can learn and effortlessly manipulate precise  
720 spatiotemporal signals at the basis of complex behavior.

721

722

## References

723 Abrahamse EL, Ruitenberg MFL, de Kleine E, Verwey WB (2013) Control of automated behavior: Insights from the discrete  
724 sequence production task. *Front Hum Neurosci* 7:1–16.

- 725 Acerbi L, Wolpert DM, Vijayakumar S (2012) Internal Representations of Temporal Statistics and Feedback Calibrate Motor-  
726 Sensory Interval Timing. *PLoS Comput Biol* 8.
- 727 Alexander GE, Crutcher MD (1990) Functional architecture of basal ganglia circuits: neural substrates of parallel processing.  
728 *Trends Neurosci* 13:266–271.
- 729 Alexander GE, DeLong MR, Strick PL (1986) Parallel organization of functionally segregated circuits linking basal ganglia and  
730 cortex. *Annu Rev Neurosci* VOL. 9:357–381.
- 731 Amador A, Perl YS, Mindlin GB, Margoliash D (2013) Elemental gesture dynamics are encoded by song premotor cortical  
732 neurons. *Nature* 495:59–64.
- 733 Amit DJ (1988) Neural networks counting chimes. *Proc Natl Acad Sci U S A* 85:2141–2145.
- 734 Augustin SM, Loewinger GC, O’Neal TJ, Kravitz A V., Lovinger DM (2020) Dopamine D2 receptor signaling on iMSNs is required  
735 for initiation and vigor of learned actions. *Neuropsychopharmacology* 45:2087–2097 Available at:  
736 <http://dx.doi.org/10.1038/s41386-020-00799-1>.
- 737 Averbeck BB, Sohn JW, Lee D (2006) Activity in prefrontal cortex during dynamic selection of action sequences. *Nat Neurosci*  
738 9:276–282.
- 739 Badre D, Frank MJ (2012) Mechanisms of hierarchical reinforcement learning in cortico-striatal circuits 2: evidence from fMRI.  
740 *Cereb Cortex* 22:527–536 Available at:  
741 <http://www.pubmedcentral.nih.gov/articlerender.fcgi?artid=3278316&tool=pmcentrez&rendertype=abstract> [Accessed  
742 December 12, 2014].
- 743 Bailey CH, Giustetto M, Huang YY, Hawkins RD, Kandel ER (2000) Is Heterosynaptic modulation essential for stabilizing hebbian  
744 plasticity and memory. *Nat Rev Neurosci* 1:11–20.
- 745 Bakhurin KI, Goudar V, Shobe JL, Claar LD, Buonomano D V., Masmanidis SC (2017) Differential Encoding of Time by Prefrontal  
746 and Striatal Network Dynamics. *J Neurosci* 37:854–870 Available at:  
747 <http://www.jneurosci.org/lookup/doi/10.1523/JNEUROSCI.1789-16.2017>.
- 748 Baram AB, Muller TH, Nili H, Garvert MM, Behrens TEJ (2021) Entorhinal and ventromedial prefrontal cortices abstract and  
749 generalize the structure of reinforcement learning problems. *Neuron* 109:713-723.e7 Available at:  
750 <https://doi.org/10.1016/j.neuron.2020.11.024>.
- 751 Bastian AJ (2006) Learning to predict the future: the cerebellum adapts feedforward movement control. *Curr Opin Neurobiol*  
752 16:645–649.
- 753 Beierholm U, Guitart-Masip M, Economides M, Chowdhury R, Düzel E, Dolan R, Dayan P (2013) Dopamine modulates reward-  
754 related vigor. *Neuropsychopharmacology* 38:1495–1503.
- 755 Bellec G, Scherr F, Hajek E, Salaj D, Legenstein R, Maass W (2019) Biologically inspired alternatives to backpropagation through  
756 time for learning in recurrent neural nets. *arXiv:1–37*.

- 757 Berdyeva TK, Olson CR (2009) Monkey Supplementary Eye Field Neurons Signal the Ordinal Position of Both Actions and  
758 Objects. *J Neurosci* 29:591–599 Available at: <http://www.jneurosci.org/cgi/doi/10.1523/JNEUROSCI.4803-08.2009>.
- 759 Berke JD (2018) What does dopamine mean? *Nat Neurosci* 21:787–793 Available at: [http://dx.doi.org/10.1038/s41593-018-](http://dx.doi.org/10.1038/s41593-018-0152-y)  
760 0152-y.
- 761 Beste C, Adelhöfer N, Gohil K, Passow S, Roessner V, Li SC (2018) Dopamine modulates the efficiency of sensory evidence  
762 accumulation during perceptual decision making. *Int J Neuropsychopharmacol* 21:649–655.
- 763 Boutin A, Massen C, Heuer H (2013) Modality-specific organization in the representation of sensorimotor sequences. *Front*  
764 *Psychol* 4:1–9.
- 765 Brunel N (2003) Dynamics and Plasticity of Stimulus-selective Persistent Activity in Cortical Network Models. *Cereb Cortex*  
766 13:1151–1161.
- 767 Buckholtz JW, Treadway MT, Cowan RL, Woodward ND, Li R, Ansari MS, Baldwin RM, Schwartzman AN, Shelby ES, Smith CE,  
768 Kessler RM, Zald DH (2010) Dopaminergic network differences in human impulsivity. *Science* (80- ) 329:532.
- 769 Burgess N, Hitch GJ (1999) Memory for serial order: A network model of the phonological loop and its timing. *Psychol Rev*  
770 106:551–581 Available at: <http://doi.apa.org/getdoi.cfm?doi=10.1037/0033-295X.106.3.551>.
- 771 Burgess N, Hitch GJ (2006) A revised model of short-term memory and long-term learning of verbal sequences. *J Mem Lang*  
772 55:627–652.
- 773 Cavanagh JF, Wiecki T V, Cohen MX, Figueroa CM, Samanta J, Sherman SJ, Frank MJ (2011) Subthalamic nucleus stimulation  
774 reverses mediofrontal influence over decision threshold. *Nat Neurosci* 14:1462–1467 Available at:  
775 <http://www.ncbi.nlm.nih.gov/pubmed/21946325>.
- 776 Chafee M V., Goldman-Rakic PS (1998) Matching patterns of activity in primate prefrontal area 8a and parietal area 7ip neurons  
777 during a spatial working memory task. *J Neurophysiol* 79:2919–2940.
- 778 Christopoulos V, Bonaiuto J, Andersen R a. (2015) A Biologically Plausible Computational Theory for Value Integration and  
779 Action Selection in Decisions with Competing Alternatives. *PLOS Comput Biol* 11:e1004104 Available at:  
780 <http://dx.plos.org/10.1371/journal.pcbi.1004104>.
- 781 Cisek P (2006) Integrated neural processes for defining potential actions and deciding between them: a computational model. *J*  
782 *Neurosci* 26:9761–9770 Available at: <http://www.ncbi.nlm.nih.gov/pubmed/16988047> [Accessed August 9, 2013].
- 783 Cisek P, Kalaska JF (2005) Neural correlates of reaching decisions in dorsal premotor cortex: specification of multiple direction  
784 choices and final selection of action. *Neuron* 45:801–814 Available at: <http://www.ncbi.nlm.nih.gov/pubmed/15748854>  
785 [Accessed March 2, 2013].
- 786 Clower WT, Alexander GE (1998) Movement sequence-related activity reflecting numerical order of components in  
787 supplementary and presupplementary motor areas. *J Neurophysiol* 80:1562–1566.
- 788 Collins AGE, Frank MJ (2013) Cognitive control over learning: creating, clustering, and generalizing task-set structure. *Psychol*

- 789 Rev 120:190–229 Available at: <http://doi.apa.org/getdoi.cfm?doi=10.1037/a0030852>.
- 790 Collins AGE, Frank MJ (2016a) Motor Demands Constrain Cognitive Rule Structures. *PLoS Comput Biol* 12:1–17.
- 791 Collins AGE, Frank MJ (2016b) Neural signature of hierarchically structured expectations predicts clustering and transfer of rule  
792 sets in reinforcement learning. *Cognition* 152:160–169 Available at: <http://dx.doi.org/10.1016/j.cognition.2016.04.002>.
- 793 Cone I, Shouval HZ (2021) Learning precise spatiotemporal sequences via biophysically realistic learning rules in a modular,  
794 spiking network. *Elife* 10:2020.04.17.046862 Available at: <https://elifesciences.org/articles/63751>.
- 795 Dalley JW, Roiser JP (2012) Dopamine, serotonin and impulsivity. *Neuroscience* 215:42–58 Available at:  
796 <http://dx.doi.org/10.1016/j.neuroscience.2012.03.065>.
- 797 Dhawale AK, Poddar R, Wolff SBE, Normand VA, Kopelowitz E, Ölveczky BP (2017) Automated long-Term recording and analysis  
798 of neural activity in behaving animals. *Elife* 6:1–40.
- 799 Diedrichsen J, Kornysheva K (2015) Motor skill learning between selection and execution. *Trends Cogn Sci* 19:227–233.
- 800 Dobbs LKK, Kaplan ARR, Lemos JCC, Matsui A, Rubinstein M, Alvarez VAA (2016) Dopamine Regulation of Lateral Inhibition  
801 between Striatal Neurons Gates the Stimulant Actions of Cocaine. *Neuron* 90:1100–1113 Available at:  
802 <http://dx.doi.org/10.1016/j.neuron.2016.04.031>.
- 803 Doherty JO, Dayan P, Schultz J, Deichmann R, Friston K, Dolan RJ (2004) Dissociable Roles of Ventral and Dorsal Striatum in  
804 Instrumental Conditioning. *304*:452–455.
- 805 Doi T, Fan Y, Gold JI, Ding L (2020) The caudate nucleus contributes causally to decisions that balance reward and uncertain  
806 visual information. *Elife* 9:568733 Available at: <https://www.biorxiv.org/content/10.1101/568733v1>.
- 807 Doyon J, Gabbitov E, Vahdat S, Lungu O, Boutin A (2017) ScienceDirect Current issues related to motor sequence learning in  
808 humans. *Curr Opin Behav Sci* 20:89–97 Available at: <http://dx.doi.org/10.1016/j.cobeha.2017.11.012>.
- 809 Durstewitz D, Seamans JK, Sejnowski TJ (2000) Neurocomputational Models of Working Memory. *Nat Neurosci* 3:1184–1191.
- 810 Economidou D, Theobald DEH, Robbins TW, Everitt BJ, Dalley JW (2012) Norepinephrine and dopamine modulate impulsivity on  
811 the five-choice serial reaction time task through opponent actions in the shell and core sub-regions of the nucleus  
812 accumbens. *Neuropsychopharmacology* 37:2057–2066.
- 813 Egger SW, Le NM, Jazayeri M (2020) A neural circuit model for human sensorimotor timing. *Nat Commun* 11:1–14 Available at:  
814 <http://dx.doi.org/10.1038/s41467-020-16999-8>.
- 815 Eichenbaum H (2014) Time cells in the hippocampus: A new dimension for mapping memories. *Nat Rev Neurosci* 15:732–744  
816 Available at: <http://dx.doi.org/10.1038/nrn3827>.
- 817 Erickson CA, Desimone R (1999) Responses of macaque perirhinal neurons during and after visual stimulus association learning.  
818 *J Neurosci* 19:10404–10416.
- 819 Erlhagen W, Schöner G (2002) Dynamic field theory of movement preparation. *Psychol Rev* 109:545–572 Available at:

- 820 <http://doi.apa.org/getdoi.cfm?doi=10.1037/0033-295X.109.3.545> [Accessed December 3, 2014].
- 821 Fiete IR, Senn W, Wang CZH, Hahnloser RHR (2010) Spike-Time-Dependent Plasticity and Heterosynaptic Competition Organize  
822 Networks to Produce Long Scale-Free Sequences of Neural Activity. *Neuron* 65:563–576 Available at:  
823 <http://dx.doi.org/10.1016/j.neuron.2010.02.003>.
- 824 Florian R V. (2007) Reinforcement learning through modulation of spike-timing-dependent synaptic plasticity. *Neural Comput*  
825 19:1468–1502.
- 826 Forstmann BU, Dutilh G, Brown SD, Neumann J, von Cramon DY, Ridderinkhof KR, Wagenmakers E-J (2008) Striatum and pre-  
827 SMA facilitate decision-making under time pressure. *Proc Natl Acad Sci U S A* 105:17538–17542.
- 828 Frank MJ (2005) Dynamic dopamine modulation in the basal ganglia: A neurocomputational account of cognitive deficits in  
829 medicated and nonmedicated Parkinsonism. *J Cogn Neurosci* 17:51–72.
- 830 Frank MJ (2006) Hold your horses: a dynamic computational role for the subthalamic nucleus in decision making. *Neural Netw*  
831 19:1120–1136 Available at: <http://www.sciencedirect.com/science/article/pii/S089360800600150X>.
- 832 Frank MJ, Samanta J, Moustafa AA, Sherman SJ (2007) Hold your horses: impulsivity, deep brain stimulation, and medication in  
833 parkinsonism. *Science* 318:1309–1312 Available at: <http://www.ncbi.nlm.nih.gov/pubmed/17962524>.
- 834 Franklin NT, Frank MJ (2018) Compositional clustering in task structure learning Daunizeau J, ed. *PLOS Comput Biol*  
835 14:e1006116 Available at: <https://dx.plos.org/10.1371/journal.pcbi.1006116>.
- 836 Franklin NT, Frank MJ (2020) Generalizing to generalize: Humans flexibly switch between compositional and conjunctive  
837 structures during reinforcement learning. Available at: <http://dx.doi.org/10.1371/journal.pcbi.1007720>.
- 838 Frémaux N, Sprekeler H, Gerstner W (2010) Functional requirements for reward-modulated spike-timing-dependent plasticity. *J*  
839 *Neurosci* 30:13326–13337.
- 840 Friedman A, Homma D, Gibb LG, Amemori KI, Rubin SJ, Hood AS, Riad MH, Graybiel AM (2015) A corticostriatal path targeting  
841 striosomes controls decision-making under conflict. *Cell* 161:1320–1333 Available at:  
842 <http://dx.doi.org/10.1016/j.cell.2015.04.049>.
- 843 Funahashi S, Bruce CJ, Goldman-Rakic PS (1989) Mnemonic coding of visual space in the monkey's dorsolateral prefrontal  
844 cortex. *J Neurophysiol* 61:331–349.
- 845 Funahashi S, Bruce CJ, Goldman-Rakic PS (1990) Visuospatial coding in primate prefrontal neurons revealed by oculomotor  
846 paradigms. *J Neurophysiol* 63:814–831.
- 847 Gaidica M, Hurst A, Cyr C, Leventhal DK (2018) Distinct populations of motor thalamic neurons encode action initiation, action  
848 selection, and movement vigor. *J Neurosci* 38:6563–6573.
- 849 Gail A, Andersen R a (2006) Neural dynamics in monkey parietal reach region reflect context-specific sensorimotor  
850 transformations. *J Neurosci* 26:9376–9384 Available at: [http://www.jneurosci.org/cgi/doi/10.1523/JNEUROSCI.1570-](http://www.jneurosci.org/cgi/doi/10.1523/JNEUROSCI.1570-06.2006)  
851 [06.2006](http://www.jneurosci.org/cgi/doi/10.1523/JNEUROSCI.1570-06.2006) [5Cnpapers3://publication/doi/10.1523/JNEUROSCI.1570-06.2006](http://www.jneurosci.org/cgi/doi/10.1523/JNEUROSCI.1570-06.2006).



- 852 Gerardin E, Lehéricy S, Pochon JB, Du Montcel ST, Mangin JF, Poupon F, Agid Y, Le Bihan D, Marsault C (2003) Foot, hand, face  
853 and eye representation in the human striatum. *Cereb Cortex* 13:162–169.
- 854 Gershman SJ, Moustafa AA, Ludvig EA (2014) Time representation in reinforcement learning models of the basal ganglia. *Front*  
855 *Comput Neurosci* 7:1–8.
- 856 Goodbody SJ, Wolpert DM (1998) Temporal and amplitude generalization in motor learning. *J Neurophysiol* 79:1825–1838.
- 857 Gouvêa TS, Monteiro T, Motiwala A, Soares S, Machens C, Paton JJ (2015) Striatal dynamics explain duration judgments. *Elife*  
858 4:1–14.
- 859 Graybiel AM (1998) The Basal Ganglia and Chunking of Action Repertoires. *Neurobiol Learn Mem* 70:119–136 Available at:  
860 <https://linkinghub.elsevier.com/retrieve/pii/S1074742798938436>.
- 861 Graybiel AM, Grafton ST (2015) The striatum: Where skills and habits meet. *Cold Spring Harb Perspect Biol* 7:1–14.
- 862 Gremel CM, Chancey JH, Atwood BK, Luo G, Neve R, Ramakrishnan C, Deisseroth K, Lovinger DM, Costa RM (2016)  
863 Endocannabinoid Modulation of Orbitostriatal Circuits Gates Habit Formation. *Neuron* 90:1312–1324 Available at:  
864 <http://dx.doi.org/10.1016/j.neuron.2016.04.043>.
- 865 Gurney K, Prescott TJ, Redgrave P (2001) A computational model of action selection in the basal ganglia. I. A new functional  
866 anatomy. *Biol Cybern* 84:401–410.
- 867 Hahnloser RHR, Kozhevnikov AA, Fee MS (2002) An ultra-sparse code underlies the generation of neural sequences in a  
868 songbird. *Nature* 419:65–70.
- 869 Hamid AA, Frank MJ, Moore CI (2021) Dopamine waves as a mechanism for spatiotemporal credit assignment. *Cell*.
- 870 Hamid AA, Pettibone JR, Mabrouk OS, Hetrick VL, Schmidt R, Vander Weele CM, Kennedy RT, Aragona BJ, Berke JD (2015)  
871 Mesolimbic dopamine signals the value of work. *Nat Neurosci* 19:117–126.
- 872 Hardy NF, Goudar V, Romero-Sosa JL, Buonomano D V. (2018) A model of temporal scaling correctly predicts that motor timing  
873 improves with speed. *Nat Commun* 9:1–14 Available at: <http://dx.doi.org/10.1038/s41467-018-07161-6>.
- 874 Hartley T, Houghton G (1996) A linguistically constrained model of short-term memory for nonwords. *J Mem Lang* 35:1–31.
- 875 Harvey CD, Coen P, Tank DW (2012) Choice-specific sequences in parietal cortex during a virtual-navigation decision task.  
876 *Nature* 484:62–68.
- 877 Heitz RP (2014) The speed-accuracy tradeoff: History, physiology, methodology, and behavior. *Front Neurosci* 8:1–19.
- 878 Herz DM, Zavala BA, Bogacz R, Brown P (2016) Neural Correlates of Decision Thresholds in the Human Subthalamic Nucleus.  
879 *Curr Biol* 26:916–920 Available at: <http://linkinghub.elsevier.com/retrieve/pii/S0960982216001330>.
- 880 Hintiryan H, Foster NN, Bowman I, Bay M, Song MY, Gou L, Yamashita S, Bienkowski MS, Zingg B, Zhu M, Yang XW, Shih JC, Toga  
881 AW, Dong HW (2016) The mouse cortico-striatal projectome. *Nat Neurosci* 19:1100–1114.
- 882 Hoerzer GM, Legenstein R, Maass W (2014) Emergence of complex computational structures from chaotic neural networks



- 883 through reward-modulated hebbian learning. *Cereb Cortex* 24:677–690.
- 884 Hooks BM, Papale AE, Paletzki RF, Feroze MW, Eastwood BS, Couey JJ, Winnubst J, Chandrashekar J, Gerfen CR (2018)  
885 Topographic precision in sensory and motor corticostriatal projections varies across cell type and cortical area. *Nat*  
886 *Commun* 9 Available at: <http://dx.doi.org/10.1038/s41467-018-05780-7>.
- 887 Hunnicutt BJ, Jongbloets BC, Birdsong WT, Gertz KJ, Zhong H, Mao T (2016) A comprehensive excitatory input map of the  
888 striatum reveals novel functional organization. *Elife* 5:1–32.
- 889 Isoda M, Tanji J (2003) Contrasting Neuronal Activity in the Supplementary and Frontal Eye Fields during Temporal Organization  
890 of Multiple Saccades. *J Neurophysiol* 90:3054–3065.
- 891 Isoda M, Tanji J (2004) Participation of the primate presupplementary motor area in sequencing multiple saccades. *J*  
892 *Neurophysiol* 92:653–659.
- 893 Ivry RB, Hazeltine RE (1995) Perception and production of temporal intervals across a range of durations: Evidence for a  
894 common timing mechanism. *J Exp Psychol Hum Percept Perform* 21:3–18 Available at:  
895 <http://doi.apa.org/getdoi.cfm?doi=10.1037/0096-1523.21.1.3>.
- 896 Izhikevich EM (2007) Solving the distal reward problem through linkage of STDP and dopamine signaling. *Cereb Cortex* 17:2443–  
897 2452.
- 898 Jazayeri M, Shadlen MN (2010) Temporal context calibrates interval timing. *Nat Neurosci* 13:1020–1026.
- 899 Jin DZ, Fujii N, Graybiel AM (2009) Neural representation of time in cortico-basal ganglia circuits. *Proc Natl Acad Sci U S A*  
900 106:19156–19161.
- 901 Jin X, Costa RM (2015) Shaping action sequences in basal ganglia circuits. *Curr Opin Neurobiol* 33:188–196 Available at:  
902 <http://dx.doi.org/10.1016/j.conb.2015.06.011>.
- 903 Jin X, Tecuapetla F, Costa RM (2014) Basal ganglia subcircuits distinctively encode the parsing and concatenation of action  
904 sequences. *Nat Neurosci* 17:423–430.
- 905 Jones CRG, Jahanshahi M (2014) Contributions of the Basal Ganglia to Temporal Processing: Evidence from Parkinson’s Disease.  
906 *Timing Time Percept* 2:87–127.
- 907 Ju H, Bassett DS (2020) Dynamic representations in networked neural systems. *Nat Neurosci* 23:908–917 Available at:  
908 <http://dx.doi.org/10.1038/s41593-020-0653-3>.
- 909 Kawai R, Markman T, Poddar R, Ko R, Fantana AL, Dhawale AK, Kampff AR, Ölveczky BP (2015) Motor Cortex Is Required for  
910 Learning but Not for Executing a Motor Skill. *Neuron* 86:800–812.
- 911 Klaes C, Schneegans S, Schöner G, Gail A (2012) Sensorimotor Learning Biases Choice Behavior: A Learning Neural Field Model  
912 for Decision Making. *PLoS Comput Biol* 8:e1002774 Available at:  
913 <http://dx.doi.org/10.1371/journal.pcbi.1002774>  
914 <http://www.ploscompbiol.org/article/fetchObjectAttachment.action?uri=info:doi/10.1371/journal.pcbi.1002774&representation=PDF>.

- 915 Klaes C, Westendorff S, Chakrabarti S, Gail A (2011) Choosing goals, not rules: deciding among rule-based action plans. *Neuron*  
916 70:536–548 Available at: <http://www.ncbi.nlm.nih.gov/pubmed/21555078> [Accessed March 7, 2013].
- 917 Koch KW, Fuster JM (1989) Unit activity in monkey parietal cortex related to haptic perception and temporary memory. *Exp*  
918 *Brain Res.*
- 919 Kozachkov L, Michmizos KP (2020) Sequence Learning in Associative Neuronal-Astrocytic Networks. In: *Lecture Notes in*  
920 *Computer Science (including subseries Lecture Notes in Artificial Intelligence and Lecture Notes in Bioinformatics)*, pp  
921 349–360 Available at: [http://link.springer.com/10.1007/978-3-030-59277-6\\_32](http://link.springer.com/10.1007/978-3-030-59277-6_32).
- 922 Kozhevnikov AA, Fee MS (2007) Singing-related activity of identified HVC neurons in the zebra finch. *J Neurophysiol* 97:4271–  
923 4283.
- 924 Koziol LF, Budding DE (2009) *Subcortical structures and cognition: Implications for neuropsychological assessment*. Springer  
925 Science & Business Media.
- 926 Laje R, Buonomano D V (2013) Robust timing and motor patterns by taming chaos in recurrent neural networks. *Nat Neurosci*  
927 16:925–933 Available at: <http://www.nature.com/doi/10.1038/nn.3405>.
- 928 Lake JJ, Meck WH (2013) Differential effects of amphetamine and haloperidol on temporal reproduction: Dopaminergic  
929 regulation of attention and clock speed. *Neuropsychologia* 51:284–292 Available at:  
930 <http://dx.doi.org/10.1016/j.neuropsychologia.2012.09.014>.
- 931 Lee J, Wang W, Sabatini BL (2020) Anatomically segregated basal ganglia pathways allow parallel behavioral modulation. *Nat*  
932 *Neurosci* Available at: <http://dx.doi.org/10.1038/s41593-020-00712-5>.
- 933 Lehnert L, Littman ML, Frank MJ (2020) Reward-predictive representations generalize across tasks in reinforcement learning.  
934 *PLoS Comput Biol* 16:1–27 Available at: <http://dx.doi.org/10.1371/journal.pcbi.1008317>.
- 935 Lloyd K, Dayan P (2015) Tamping Ramping: Algorithmic, Implementational, and Computational Explanations of Phasic Dopamine  
936 Signals in the Accumbens. *PLoS Comput Biol* 11:1–34.
- 937 Lo CC, Wang XJ (2006) Cortico-basal ganglia circuit mechanism for a decision threshold in reaction time tasks. *Nat Neurosci*  
938 9:956–963.
- 939 Logiaco L, Abbott LF, Escola S (2019) A model of flexible motor sequencing through thalamic control of cortical dynamics.  
940 [bioRxiv:2019.12.17.880153](https://doi.org/10.1101/2019.12.17.880153).
- 941 Luczak A, Barthó P, Marguet SL, Buzsáki G, Harris KD (2007) Sequential structure of neocortical spontaneous activity in vivo.  
942 *Proc Natl Acad Sci U S A* 104:347–352.
- 943 Lungu O, Monchi O, Albouy G, Jubault T, Ballarin E, Burnod Y, Doyon J (2014) Striatal and hippocampal involvement in motor  
944 sequence chunking depends on the learning strategy. *PLoS One* 9:25–27.
- 945 MacDonald CJ, Carrow S, Place R, Eichenbaum H (2013) Distinct hippocampal time cell sequences represent odor memories in  
946 immobilized rats. *J Neurosci* 33:14607–14616.

- 947 Maes A, Barahona M, Clopath C (2020) Learning spatiotemporal signals using a recurrent spiking network that discretizes time.  
948 PLoS Comput Biol 16:1–26 Available at: <http://dx.doi.org/10.1371/journal.pcbi.1007606>.
- 949 McClure SM, Berns GS, Montague PR (2003) Temporal Prediction Errors in a Passive Learning Task Activate Human Striatum.  
950 38:339–346.
- 951 McHaffie JG, Stanford TR, Stein BE, Coizet V, Redgrave P (2005) Subcortical loops through the basal ganglia. Trends Neurosci  
952 28:401–407 Available at: <http://www.ncbi.nlm.nih.gov/pubmed/15982753> [Accessed November 21, 2014].
- 953 Mello GBM, Soares S, Paton JJ (2015) A scalable population code for time in the striatum. Curr Biol 25:1113–1122 Available at:  
954 <http://dx.doi.org/10.1016/j.cub.2015.02.036>.
- 955 Miconi T (2017) Biologically plausible learning in recurrent neural networks reproduces neural dynamics observed during  
956 cognitive tasks. Elife 6:1–24.
- 957 Miller EK, Erickson CA, Desimone R (1996) Neural mechanisms of visual working memory in prefrontal cortex of the macaque. J  
958 Neurosci 16:5154–5167.
- 959 Mink JW (1996) The basal ganglia: Focused selection and inhibition of competing motor programs. Prog Neurobiol 50:381–425.
- 960 Miyashita Y, Chang HS (1988) Neuronal correlate of pictorial short-term memory in the primate temporal cortex. Nature  
961 331:68–70 Available at: <http://www.nature.com/articles/331068a0>.
- 962 Montague PR, Dayan P, Person C, Sejnowski TJ (1995) Bee foraging in uncertain environments. Nature 377:725–728 Available  
963 at: [http://papers.cnl.salk.edu/PDFs/Bee Foraging in Uncertain Environments Using Predictive Hebbian Learning 1995-](http://papers.cnl.salk.edu/PDFs/Bee%20Foraging%20in%20Uncertain%20Environments%20Using%20Predictive%20Hebbian%20Learning%201995-3013.pdf)  
964 3013.pdf.
- 965 Murray JM, Escola GS (2017) Learning multiple variable-speed sequences in striatum via cortical tutoring. Elife 6:1–24.
- 966 Nakamura K, Kubota K (1995) Mnemonic firing of neurons in the monkey temporal pole during a visual recognition memory  
967 task. J Neurophysiol 74:162–178.
- 968 O'Reilly RC, Frank MJ (2006) Making working memory work: a computational model of learning in the prefrontal cortex and  
969 basal ganglia. Neural Comput 18:283–328 Available at: <http://cognet.mit.edu/journal/10.1162/089976606775093909>.
- 970 Oh SW et al. (2014) A mesoscale connectome of the mouse brain. Nature 508:207–214.
- 971 Okubo TS, Mackevicius EL, Payne HL, Lynch GF, Fee MS (2015) Growth and splitting of neural sequences in songbird vocal  
972 development. Nature 528:352–357.
- 973 Otchy TM, Wolff SBE, Rhee JY, Pehlevan C, Kawai R, Kempf A, Gobes SMH, Ölveczky BP (2015) Acute off-target effects of neural  
974 circuit manipulations. Nature 528:358–363.
- 975 Page MPA, Norris D (1998) The primacy model: A new model of immediate serial recall. Psychol Rev 105:761–781 Available at:  
976 <https://psycnet.apa.org/buy/1998-12733-005>.
- 977 Panigrahi B, Martin KA, Li Y, Graves AR, Vollmer A, Olson L, Mensh BD, Karpova AY, Dudman JT (2015) Dopamine Is Required for

- 978 the Neural Representation and Control of Movement Vigor. *Cell* 162:1418–1430.
- 979 Pastalkova E, Itskov V, Amarasingham A, Buzsaki G (2008) Internally Generated Cell Assembly Sequences in the Rat  
980 Hippocampus. *Science* (80- ) 321:1322–1327 Available at:  
981 <https://www.sciencemag.org/lookup/doi/10.1126/science.1159775>.
- 982 Paton JJ, Buonomano D V. (2018) The Neural Basis of Timing: Distributed Mechanisms for Diverse Functions. *Neuron* 98:687–  
983 705 Available at: <https://doi.org/10.1016/j.neuron.2018.03.045>.
- 984 Pattij T, Vanderschuren LJMJ (2008) The neuropharmacology of impulsive behaviour. *Trends Pharmacol Sci* 29:192–199.
- 985 Pereira U, Brunel N (2020) Unsupervised Learning of Persistent and Sequential Activity. *Front Comput Neurosci* 13:1–19.
- 986 Peters AJ, Fabre JMJ, Steinmetz NA, Harris KD, Carandini M (2021) Striatal activity topographically reflects cortical activity.  
987 *Nature* 591 Available at: <http://dx.doi.org/10.1038/s41586-020-03166-8>.
- 988 Pine A, Shiner T, Seymour B, Dolan RJ (2010) Dopamine, time, and impulsivity in humans. *J Neurosci* 30:8888–8896.
- 989 Rajan K, Harvey CDD, Tank DWW (2016) Recurrent Network Models of Sequence Generation and Memory. *Neuron* 90:128–142  
990 Available at: <http://dx.doi.org/10.1016/j.neuron.2016.02.009>.
- 991 Rakitin BC, Penney TB, Gibbon J, Malapani C, Hinton SC, Meck WH (1998) Scalar expectancy theory and peak-interval timing in  
992 humans. *J Exp Psychol Anim Behav Process* 24:15–33.
- 993 Ratcliff R (1978) A theory of memory retrieval. *Psychol Rev* 85:59–108.
- 994 Ratcliff R, Frank MJ (2012) Reinforcement-based decision making in corticostriatal circuits: Mutual constraints by  
995 neurocomputational and diffusion models. *Neural Comput* 24:1186–1229.
- 996 Ratcliff R, Rouder JN (1998) Modelling response times for two choice decisions. *Psychol Sci* 9:347–356.
- 997 Recanatani S, Pereira U, Murakami M, Mainen Z, Mazzucato L (2020) Metastable attractors explain the variable timing of stable  
998 behavioral action sequences. *bioRxiv*:0–40.
- 999 Remington ED, Egger SW, Narain D, Wang J, Jazayeri M (2018) A Dynamical Systems Perspective on Flexible Motor Timing.  
1000 *Trends Cogn Sci* 22:938–952 Available at: <https://doi.org/10.1016/j.tics.2018.07.010>.
- 1001 Rikhye R V., Gilra A, Halassa MM (2018) Thalamic regulation of switching between cortical representations enables cognitive  
1002 flexibility. *Nat Neurosci* 21:1753–1763 Available at: <http://dx.doi.org/10.1038/s41593-018-0269-z>.
- 1003 Rueda-Orozco PE, Robbe D (2015) The striatum multiplexes contextual and kinematic information to constrain motor habits  
1004 execution. *Nat Neurosci* 18:453–462.
- 1005 Salinas E (2009) Rank-Order-Selective Neurons Form a Temporal Basis Set for the Generation of Motor Sequences. *J Neurosci*  
1006 29:4369–4380 Available at: <http://www.jneurosci.org/cgi/doi/10.1523/JNEUROSCI.0164-09.2009>.
- 1007 Schmitt LI, Wimmer RD, Nakajima M, Happ M, Mofakham S, Halassa MM (2017) Thalamic amplification of cortical connectivity  
1008 sustains attentional control. *Nature* 545:219–223.

- 1009 Schwartze M, Keller PE, Patel AD, Kotz SA (2011) The impact of basal ganglia lesions on sensorimotor synchronization,  
1010 spontaneous motor tempo, and the detection of tempo changes. *Behav Brain Res* 216:685–691 Available at:  
1011 <http://dx.doi.org/10.1016/j.bbr.2010.09.015>.
- 1012 Sedaghat-Nejad E, Herzfeld DJ, Shadmehr R (2019) Reward prediction error modulates saccade vigor. *J Neurosci* 39:5010–5017.
- 1013 Shima K, Tanji J (2000) Neuronal activity in the supplementary and presupplementary motor areas for temporal organization of  
1014 multiple movements. *J Neurophysiol* 84:2148–2160 Available at: <http://www.ncbi.nlm.nih.gov/pubmed/11024102>.
- 1015 Shmuelof L, Krakauer JW, Mazzoni P (2012) How is a motor skill learned? Change and invariance at the levels of task success  
1016 and trajectory control. *J Neurophysiol* 108:578–594.
- 1017 Soltoggio A, Steil JJ (2013) Solving the distal reward problem with rare correlations. *Neural Comput* 25:940–978.
- 1018 Sussillo D, Abbott LF (2009) Generating Coherent Patterns of Activity from Chaotic Neural Networks. *Neuron* 63:544–557  
1019 Available at: <http://dx.doi.org/10.1016/j.neuron.2009.07.018>.
- 1020 Taverna S, Ilijic E, Surmeier DJ (2008) Recurrent collateral connections of striatal medium spiny neurons are disrupted in models  
1021 of Parkinson’s disease. *J Neurosci* 28:5504–5512.
- 1022 Thach WT, Goodkin HP, Keating JG (1992) The cerebellum and the adaptive coordination of movement. *Annu Rev Neurosci*  
1023 15:403–442.
- 1024 Thura D, Cisek P (2017) The Basal Ganglia Do Not Select Reach Targets but Control the Urgency of Commitment. *Neuron*  
1025 95:1160–1170.e5 Available at: <http://dx.doi.org/10.1016/j.neuron.2017.07.039>.
- 1026 van Gaalen MM, van Koten R, Schoffeleer ANM, Vanderschuren LJM (2006) Critical Involvement of Dopaminergic  
1027 Neurotransmission in Impulsive Decision Making. *Biol Psychiatry* 60:66–73.
- 1028 Veliz-Cuba A, Shouval HZ, Josić K, Kilpatrick ZP (2015) Networks that learn the precise timing of event sequences. *J Comput*  
1029 *Neurosci* 39:235–254.
- 1030 Verwey WB, Shea CH, Wright DL (2014) A cognitive framework for explaining serial processing and sequence execution  
1031 strategies. *Psychon Bull Rev* 22:54–77.
- 1032 Wang XJ (2001) Synaptic reverberation underlying mnemonic persistent activity. *Trends Neurosci* 24:455–463.
- 1033 Watabe-Uchida M, Eshel N, Uchida N (2017) Neural Circuitry of Reward Prediction Error. *Annu Rev Neurosci* 40:373–394.
- 1034 Westbrook A, van den Bosch R, Määttä JI, Hofmans L, Papadopetraki D, Cools R, Frank MJ (2020) Dopamine promotes cognitive  
1035 effort by biasing the benefits versus costs of cognitive work. *Science* (80- ) 367:1362–1366.
- 1036 Whittington JCR, Muller TH, Mark S, Chen G, Barry C, Burgess N, Behrens TEJ (2020) The Tolman-Eichenbaum Machine: Unifying  
1037 Space and Relational Memory through Generalization in the Hippocampal Formation. *Cell* 183:1249–1263.e23 Available  
1038 at: <https://doi.org/10.1016/j.cell.2020.10.024>.
- 1039 Wiecki TV, Frank MJ (2013) A computational model of inhibitory control in frontal cortex and basal ganglia. *Psychol Rev*

1040 120:329–355.

1041 Wymbs NF, Bassett DS, Mucha PJ, Porter MA, Grafton ST (2012) Article Differential Recruitment of the Sensorimotor Putamen  
1042 and Frontoparietal Cortex during Motor Chunking in Humans. *Neuron* 74:936–946 Available at:  
1043 <http://dx.doi.org/10.1016/j.neuron.2012.03.038>.

1044 Yousif N, Fu RZ, Abou-El-Ela Bourquin B, Bhrugubanda V, Schultz SR, Seemungal BM (2016) Dopamine activation preserves  
1045 visual motion perception despite noise interference of human v5/mt. *J Neurosci* 36:9303–9312.

1046 Zénon A, Devesse S, Olivier E (2016) Dopamine manipulation affects response vigor independently of opportunity cost. *J*  
1047 *Neurosci* 36:9516–9525.

1048 Znamenskiy P, Zador AM (2013) Corticostriatal neurons in auditory cortex drive decisions during auditory discrimination. *Nature*  
1049 497:482–485 Available at: <http://dx.doi.org/10.1038/nature12077>.

1050

## 1051 **Appendix A**

1052 Our ACDC model contains three main modules (Fig. 1): an input layer (Fig. 1A), an RNN (representing  
1053 premotor cortex; Fig. 1B), a BG-thalamus unit (Fig. 1C).

1054 The input layer reflects a vector of  $N=200$  neurons of which a subset (20) is activated and each neuron  
1055 excites only one neuron in the RNN.

1056 The dynamics within the ACDC model represent the sequential unfolding of RNN-BG-thalamus-RNN (i.e.,  
1057 cortico-basal ganglia) loops, depicted by the light blue arrows in figure 1. The loop starts with the  
1058 activation of a cluster of excitatory RNN neurons, and the dynamics of the RNN excitatory neurons are  
1059 governed by equation 3:

$$1060 \quad \tau_{mn} \frac{dx_i}{dt} = -x_i + \Theta \left( \sum_{j=1}^N W_{ij} x_j - J^{EI} x_I + J^{EA} (x_A \gamma_E) + x_i^{in} \right) \quad \text{equation 3}$$

1061 where  $x_i$  and  $x_j$  represent post and pre-synaptic RNN unit activity (purple nodes in Fig. 1B) and  $W_{ij}$  is the  
1062 recurrent weight matrix.  $J^{EI}$  and  $J^{EA}$  represent respectively the weights from the shared inhibitory neuron  
1063 (orange node in Fig. 1B) and from the motor thalamus neurons (from here on termed Action nodes for  
1064 simplicity) to the excitatory RNN units.  $x_I$ ,  $x_A$  and  $x_i^{in}$  represent respectively the activity of the shared  
1065 inhibitory neuron, Action nodes (see below), and the input to the excitatory RNN units.  $\gamma_E$  is the gain on  
1066 Action nodes activation projected to the excitatory RNN neurons (see below for the functional property  
1067 of this parameter).  $\Theta$ , the non-linear transformation function, is governed by  $\Theta(x) = (2 / (1 + e^{-\lambda x})) - 1$

1068 (where  $\lambda$  is the gain parameter and with additional non-linearity at zero, i.e.  $\Theta(x) = 0$  if  $\Theta(x) < 0$ ); and  $\tau_{rnn}$   
 1069 is the encoding constant. Note that input projections and all Action nodes to RNN projections are  
 1070 orthogonal (i.e. some RNN excitatory neurons receive inputs from the input layer, whereas others  
 1071 receive from inputs from Action nodes; each projection excites 20 RNN units). The shared inhibitory  $x_I$   
 1072 activation is described by equation 4:

$$1073 \quad \tau_{rnn} \frac{dx_I}{dt} = -x_I + J^{IE} x_i + J^{IA} (x_A \gamma_I) \quad \text{equation 4}$$

1074 where  $J^{IE}$ ,  $J^{IA}$  and  $\gamma_I$  respectively represent the weights from the excitatory RNN neurons to their shared  
 1075 inhibitory neuron, the weights from the Action nodes to the shared inhibitory neuron, and the gain on  
 1076 Action nodes activation for the projections towards the inhibitory neuron in the RNN.

1077 In turn, each excitatory RNN cluster projects to its corresponding “Go” cell in the BG (blue arrow 1 from  
 1078 Fig. 1B to Go node in Fig. 1C), and each Go cell accumulates evidence for the  $j^{th}$  action associated to the  
 1079  $j^{th}$  order, following equation 5:

$$1080 \quad \tau_g \frac{dg_j}{dt} = -g_j + \sum_i^N W_{ij} x_i - J^{GN} n_j \quad \text{equation 5}$$

1081 where  $g_j$  is the activation of the  $j^{th}$  Go units,  $W_{ij}$  is the weight matrix representing connectivity between  
 1082 RNN and Go units,  $x_i$  is the activity of the RNN excitatory units,  $J^{GN}$  is the inhibitory weight between the  
 1083  $j^{th}$  No Go and Go nodes,  $n_j$  is the activation of the  $j^{th}$  No Go node, and  $\tau_g$  is the encoding constant (with  $\tau_g$   
 1084  $\gg 0$ , thereby simulating evidence accumulation-like dynamics).

1085 Striatal Go cells facilitate response execution by projecting towards the corresponding Action nodes  
 1086 (blue arrow 2 from the Go to Action nodes in Fig. 1C), whose dynamics are governed by equation 6:

$$1087 \quad \tau_a \frac{da_j}{dt} = -a_j + \Theta(J^{AG} g_j - b) \quad \text{equation 6}$$

1088 where  $a_j$  is the activation of the  $j^{th}$  action,  $g_j$  is the activation of the  $j^{th}$  Go unit,  $b$  is the negative bias (i.e.  
 1089 threshold),  $\Theta$  is a nonlinear function as in equation 3, and  $\tau_a$  is the encoding constant.  $J^{AG}$  is the weight  
 1090 from the  $j^{th}$  Go unit to the  $j^{th}$  Action unit, and was randomly drawn from a Gaussian distribution with  
 1091 mean = 2 and s.d. = 0.2. In turn, Action nodes project excitatory connections to three distinct parts of

1092 the network simultaneously. First, Action nodes project to the cluster of excitatory neurons in the RNN  
 1093 representing the  $i+1^{th}$  order in the sequences (blue arrow 3a in Fig. 1). Second, Action nodes project to  
 1094 the inhibitory shared neuron (blue arrow 3b to orange node in Fig. 1), that in turn globally inhibits all the  
 1095 clusters in the RNN. Note that the gain parameter values on Action nodes activity are larger for  
 1096 projections to the excitatory clusters vs inhibitory neuron of the RNN (i.e.  $\gamma_E > \gamma_I$ ). This allows the  
 1097 activation of Action nodes to perturb the E-I RNN balance in a way that allows the  $j^{th}$  cluster to shut  
 1098 down and the  $i+1^{th}$  cluster to be expressed. Third, Action nodes project excitatory connections back to  
 1099 their corresponding No Go cells (blue arrow 3c from  $j^{th}$  Action node in the thalamus to  $j^{th}$  No Go node in  
 1100 the BG, see Fig. 1C). The dynamics of No Go cells are in turn dictated by equation 7:

$$1101 \quad \tau_n \frac{dn_j}{dt} = -n_j + J^{NA} a_j \quad \text{equation 7}$$

1102 where  $n_j$  is the activation of the  $j^{th}$  No Go node,  $J^{NA}$  is the weight from the  $j^{th}$  Action unit to the  $j^{th}$  No Go  
 1103 unit,  $a_j$  is the activation of the  $j^{th}$  Action node, and  $\tau_n$  is the encoding constant.

1104 In Table 1 we report the parameter values used for all eight simulations described in the main text.

1105 Table 1. Parameter values for all simulations

| Parameters                                                      | Values         |
|-----------------------------------------------------------------|----------------|
| $\alpha_1$ (RNN) / $\alpha_1$ (RNN-Go)                          | 0.01 / 0.00002 |
| $\alpha_2$ (RNN) / $\alpha_2$ (RNN-Go)                          | 0.1 / 0.4      |
| $W_{\max}$ (RNN) / $W_{\max}$ (RNN-Go)                          | 1 / 0.05       |
| $\tau_w, b$                                                     | 0.5            |
| $\eta$                                                          | 0.4            |
| $\phi$                                                          | 0.01           |
| $\tau_a, \tau_n, J^E$                                           | 0.1            |
| $\gamma_E / \gamma_I$                                           | 21.4 / 21      |
| $\tau_{rnn}, \chi^{in}, J^{EI}, J^{EA}, J^{IA}, J^{GN}, J^{NA}$ | 1              |
| $\lambda_{rnn} / \lambda_a$                                     | 10 / 10000     |
| $\tau_g$                                                        | 0.001          |

1106

1107
